# Supplementary material
Source: PubMed Central journal article supplement (PMC4048757)
Supplement: NIHMS473423-supplement-10858_2013_9732_MOESM1_ESM.pdf [file NIHMS473423-supplement-10858_2013_9732_MOESM1_ESM.pdf]

## Supplementary Information

### Practical Use of Chemical Shift Databases for Protein Solid-State NMR: 2D Chemical Shift Maps and Amino-Acid Assignment with Secondary-Structure Information

K. J. Fritzsching, Y. Yang, K. Schmidt-Rohr, and Mei Hong\*

Department of Chemistry and Ames Laboratory, Iowa State University, Ames, IA 50011

Corresponding author: Mei Hong

Tel: 515-294-3521, Fax: 515-294-0105, email: [mhong@iastate.edu](mailto:mhong@iastate.edu)

**Figures S1-20.** Full 2D  $^{13}\text{C}$ - $^{13}\text{C}$  chemical shift correlation maps for the 20 amino acids, organized in alphabetical order for the one-letter amino acid code. In each figure the chemical shifts are color-coded as red for helix, green for sheet, and blue for coil. Each figure is annotated with peak assignments. On the top of each figure the numbers of residues in the PACSY database for each secondary structure are shown (the same information in Table 1). At the bottom of each figure the contour-level ranges are given.

Supplemental Figure S1

**Ala** Helix: 8,462 Sheet: 3,064 Coil: 7,123 Total:18,649

**A**

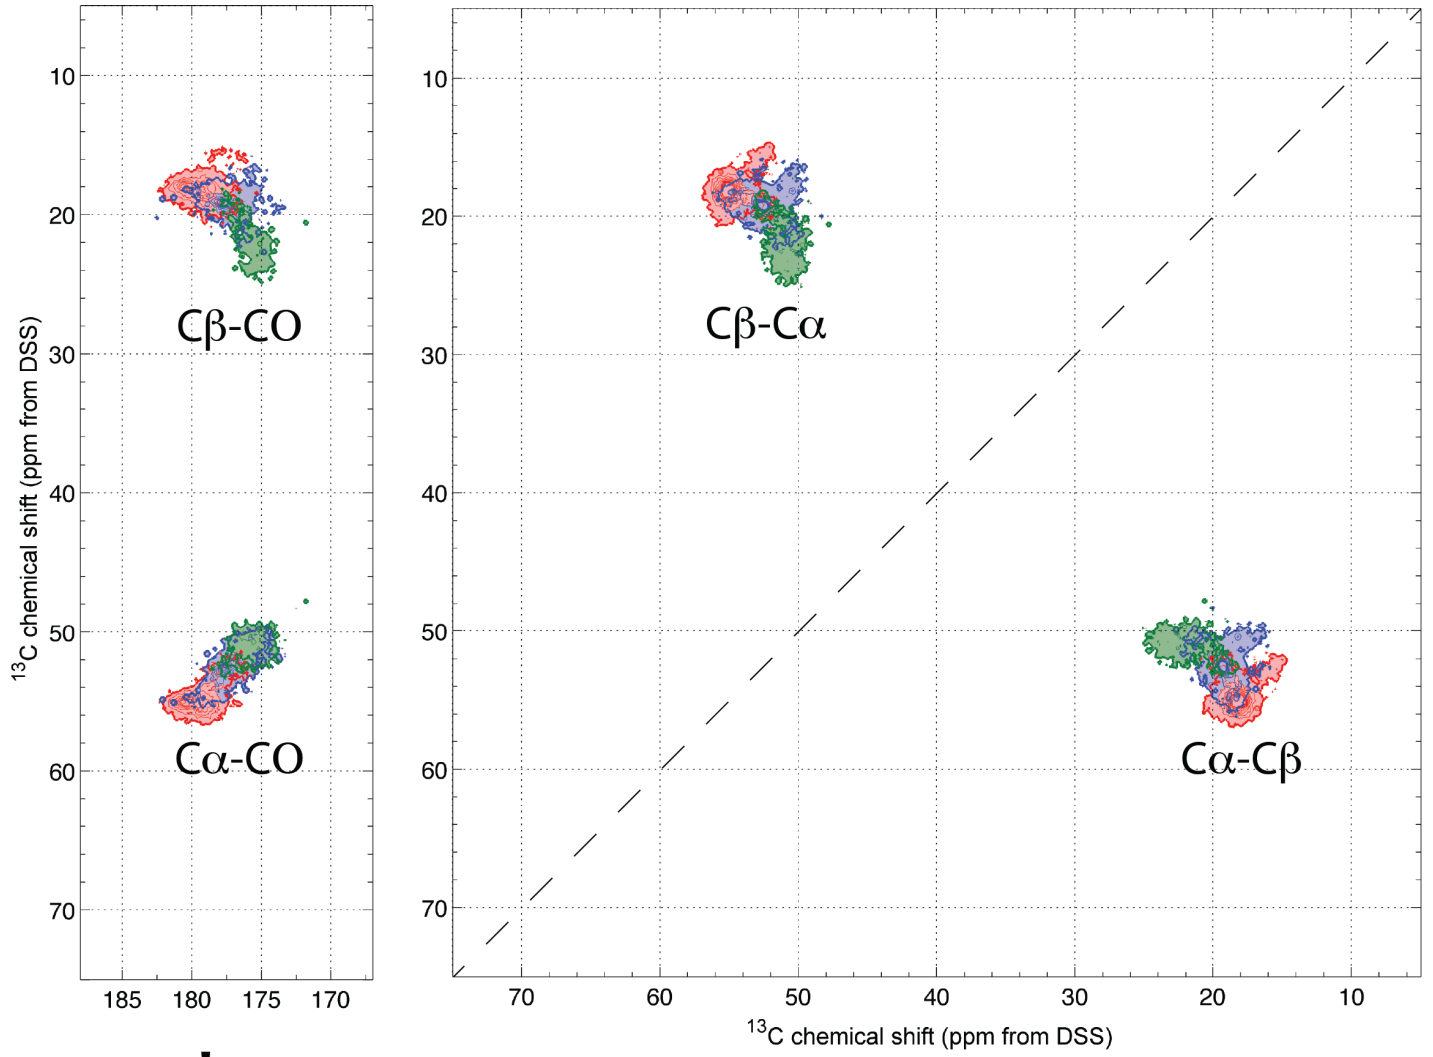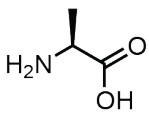

Supplemental Figure S2

**Cys** Helix: 1,224 Sheet: 1,297 Coil: 2,187 Total: 4,708

C

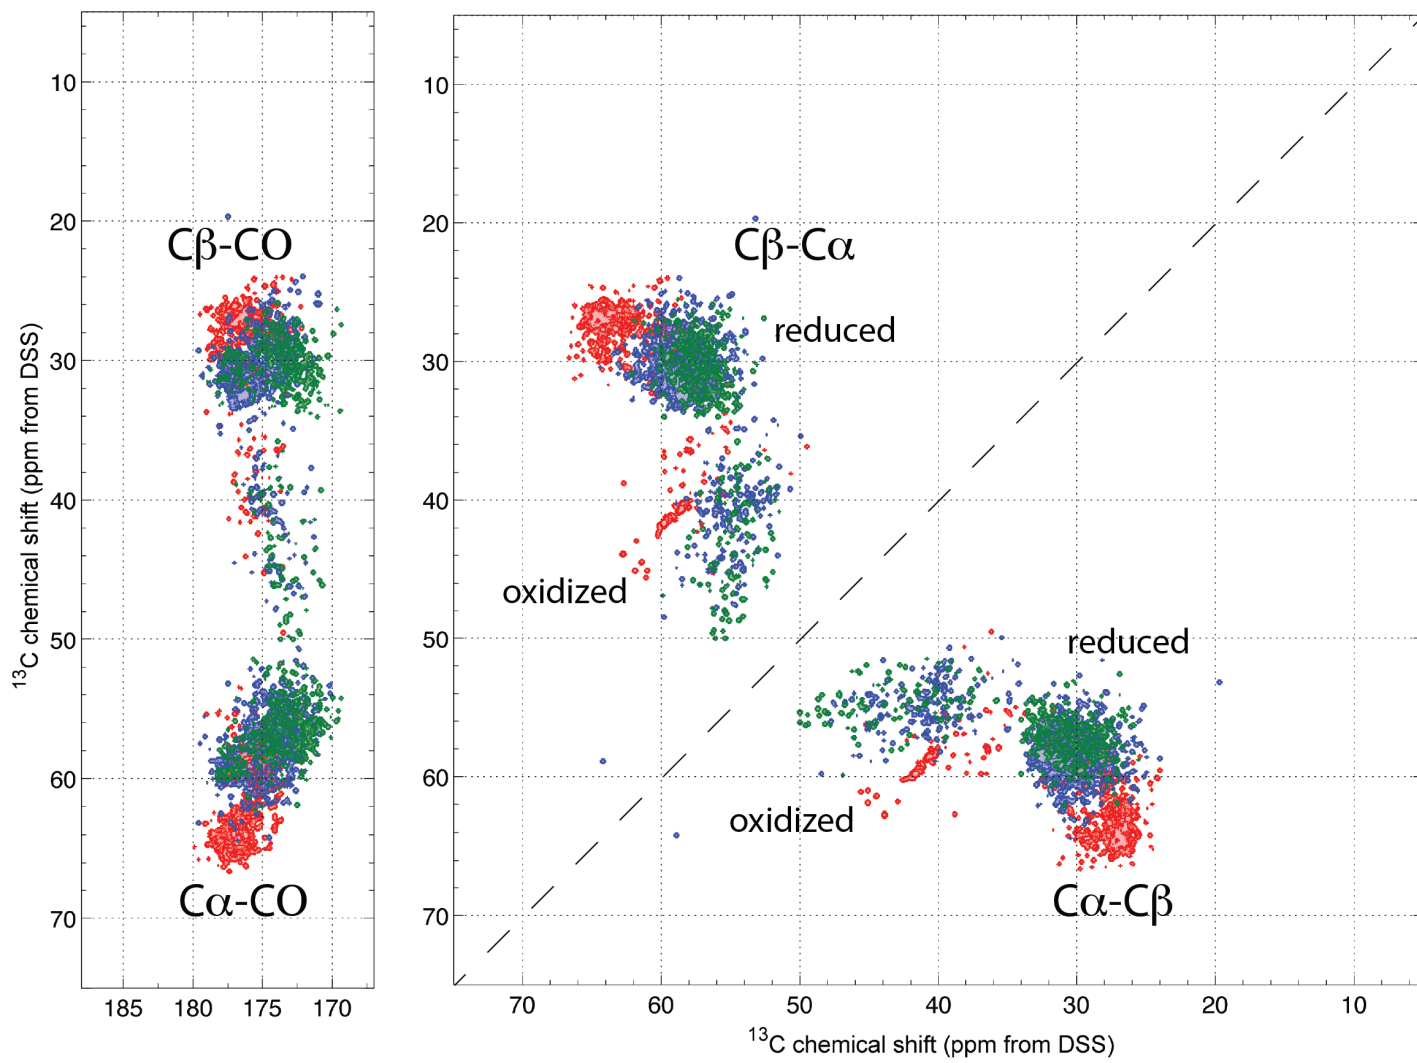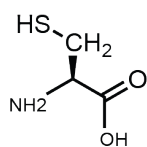

**Asp** Helix: 4,441 Sheet: 1,893 Coil: 9,005 Total: 15,339**D**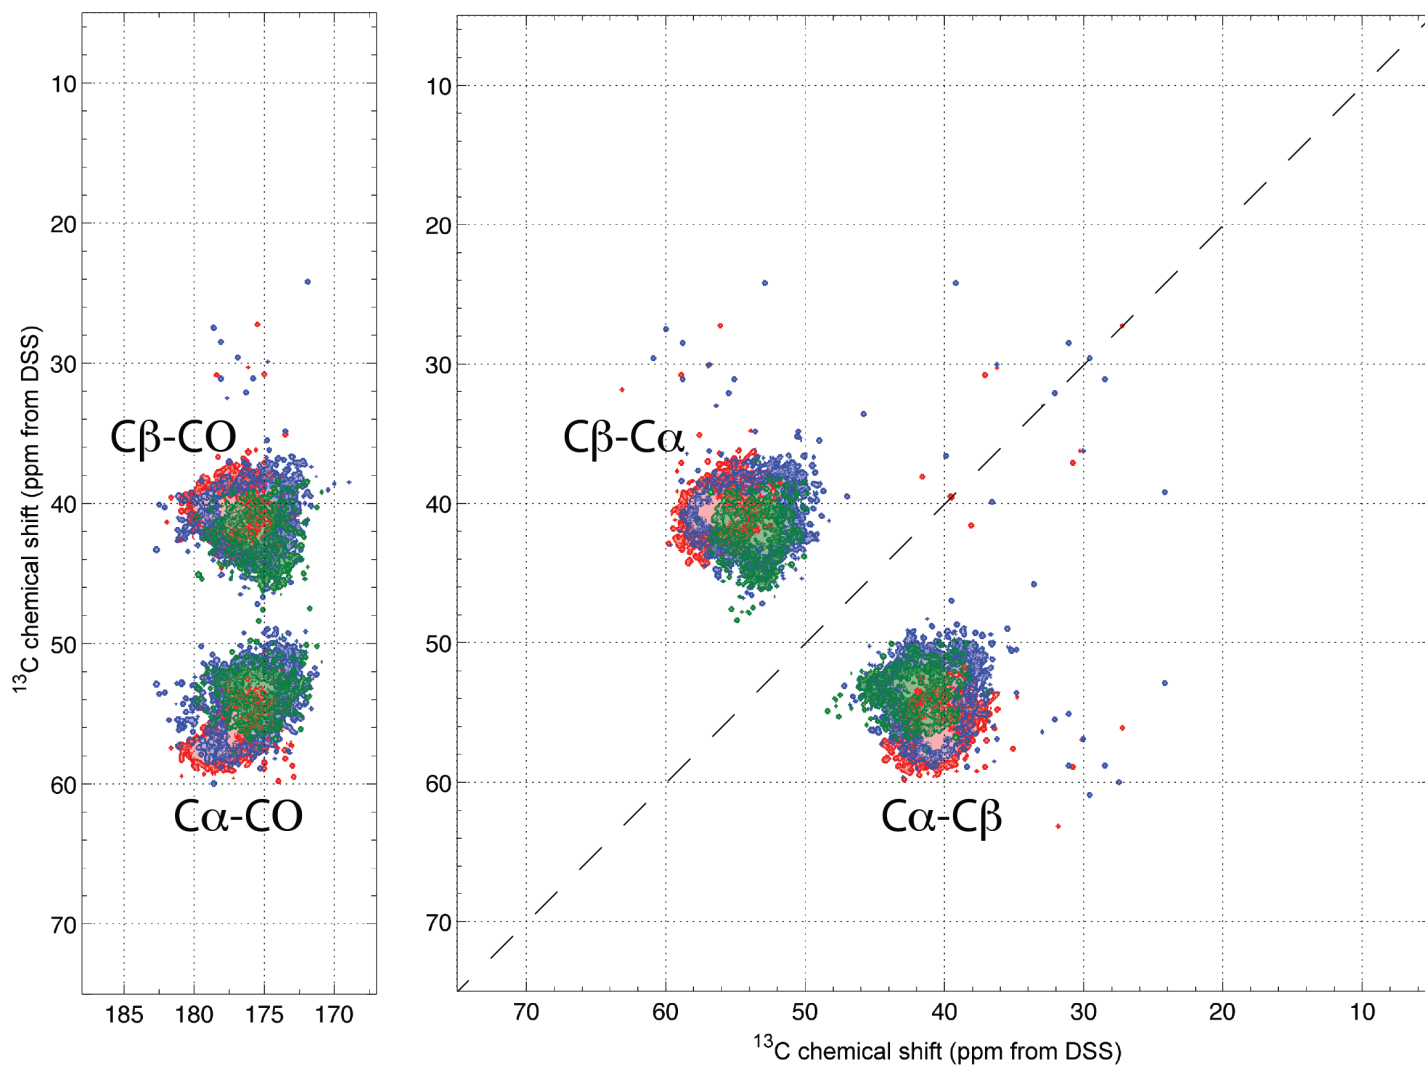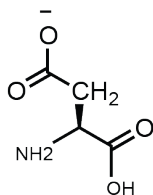

Supplemental Figure S4

**Glu** Helix: 8,862 Sheet: 3,590 Coil: 7,824 Total: 20,276

**E**

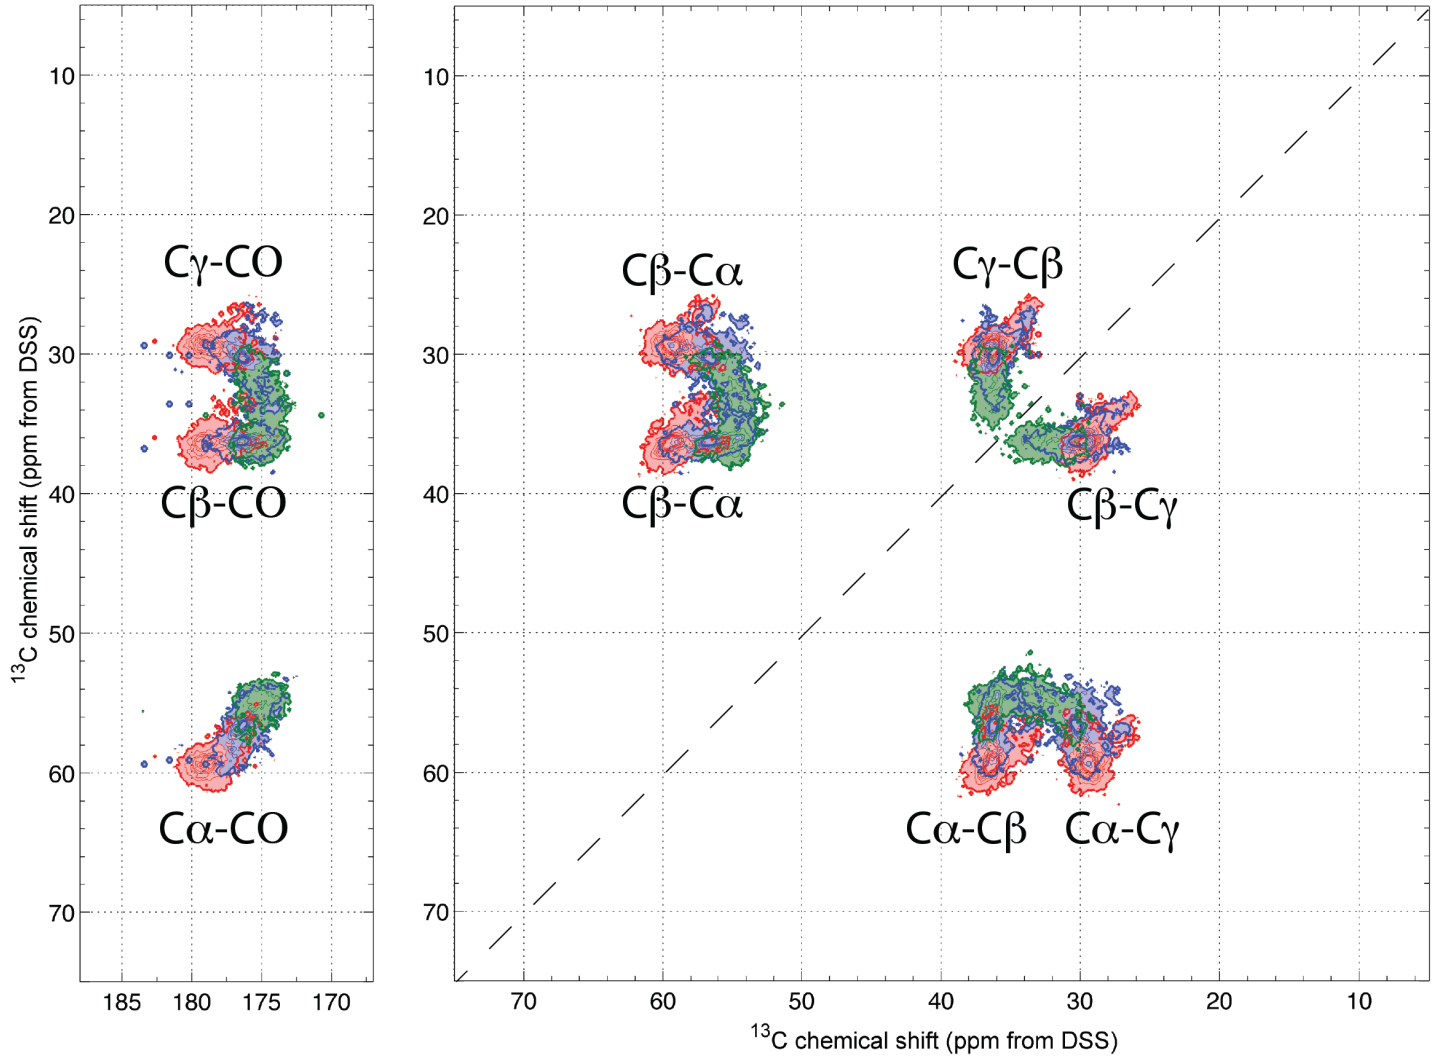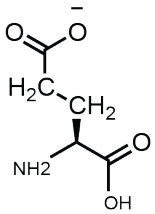

Supplemental Figure S5

**Phe** Helix: 3,358 Sheet: 3,387 Coil: 2,879 Total: 9624

**F**

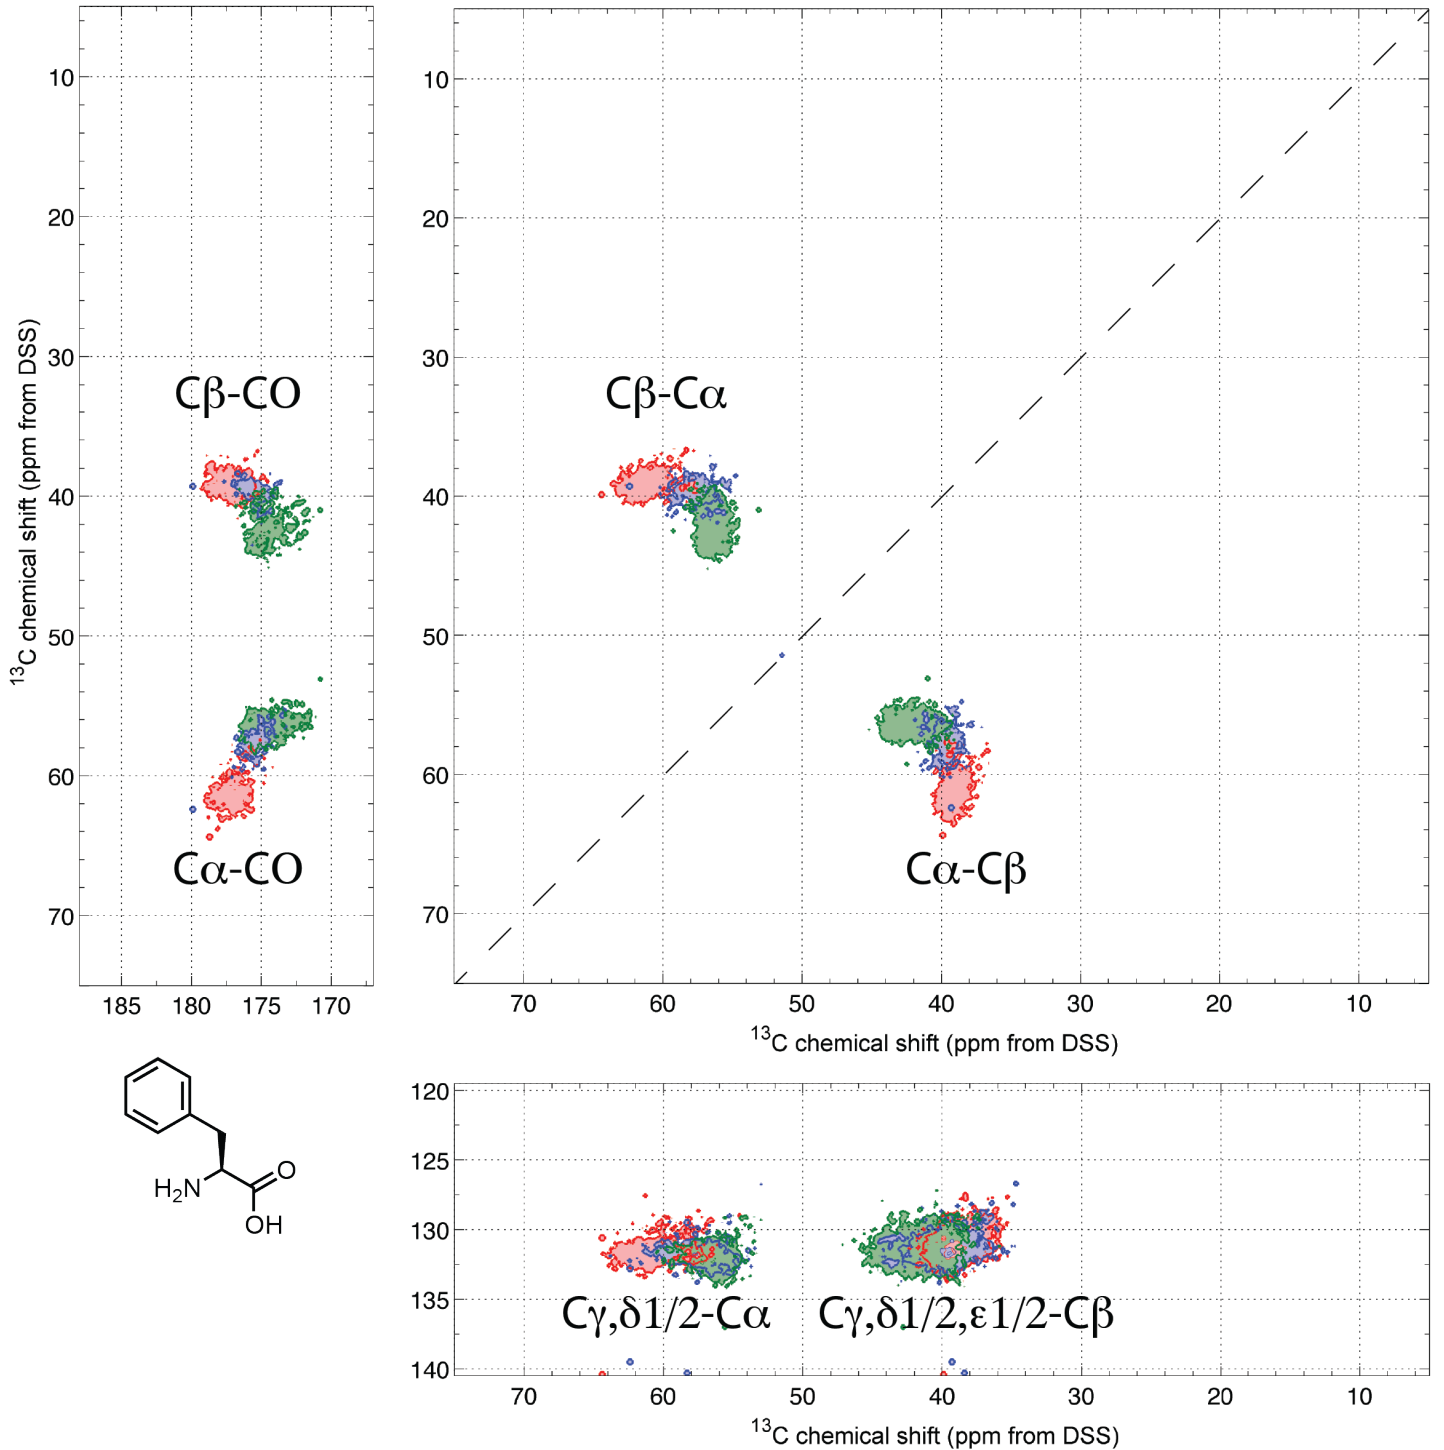

0.5% -- 50% Contour Levels

Supplemental Figure S6

**Gly** Helix: 2,209 Sheet: 2,314 Coil: 14,470 Total: 18,993

**G**

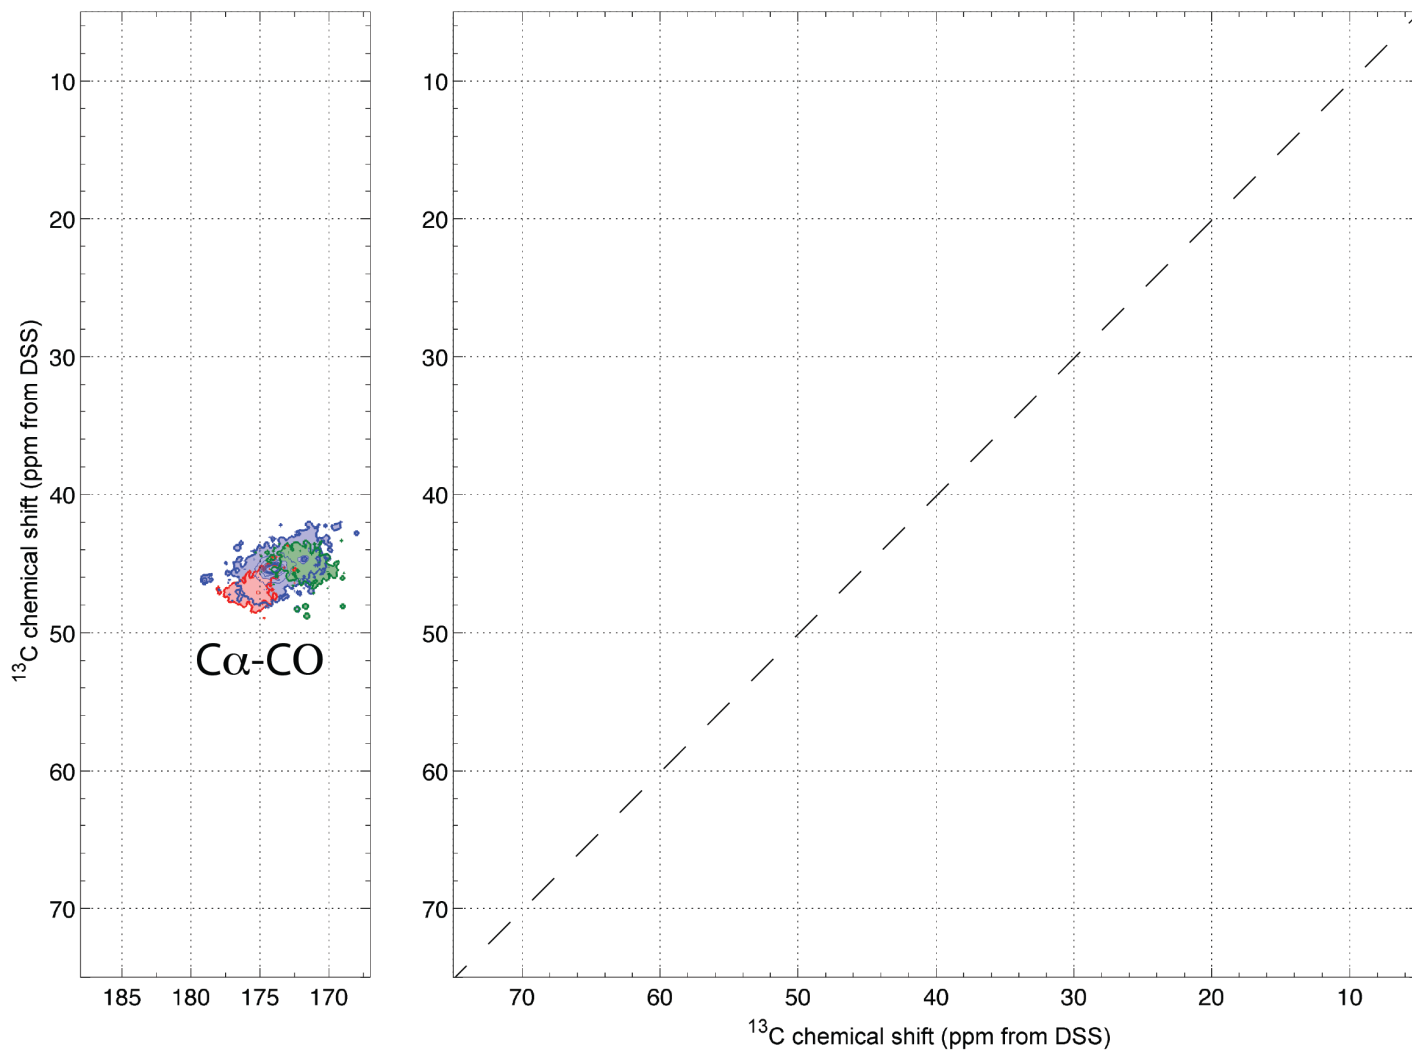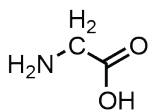

6% -- 50% Contour Levels

Supplemental Figure S7

**His** Helix: 1,844 Sheet: 1,253 Coil: 2,915 Total: 6,012

H

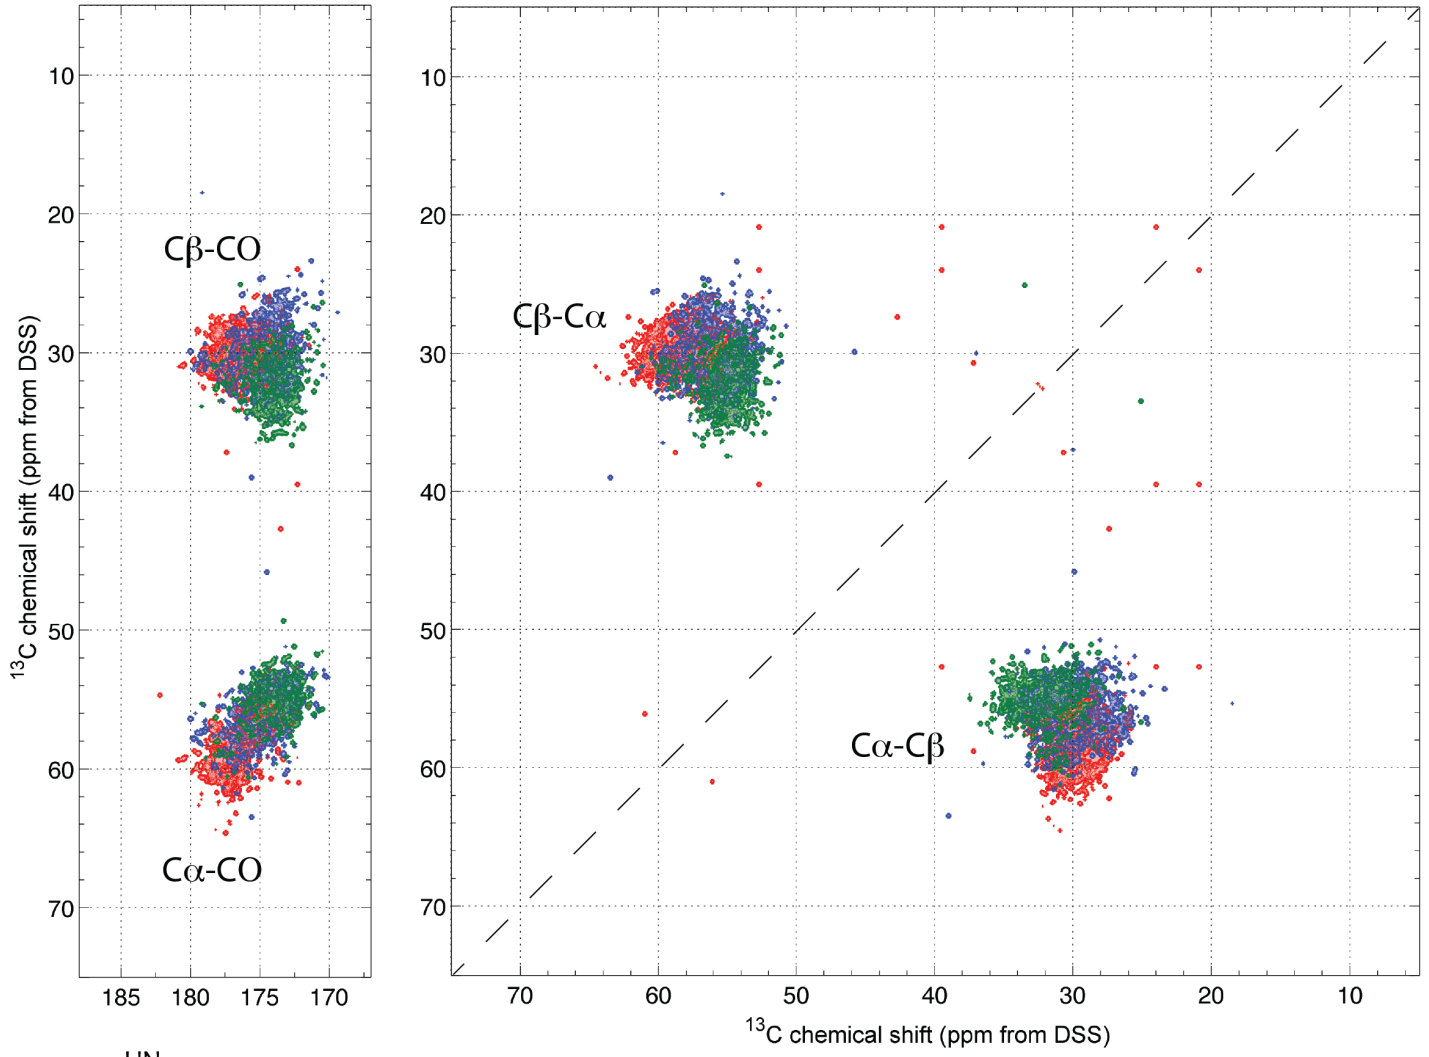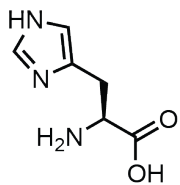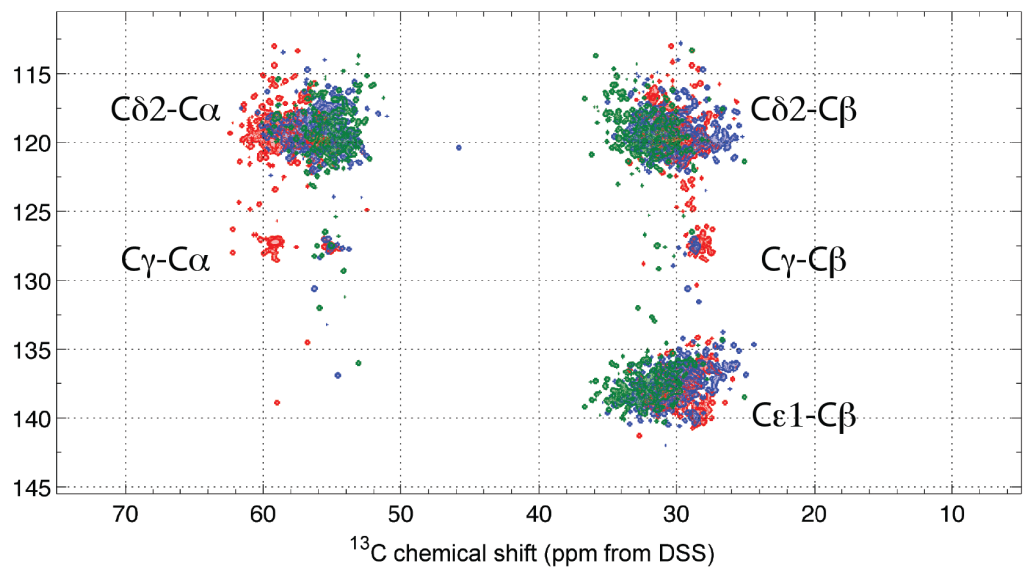

6% -- 50% Contour Levels



Supplemental Figure S8

**Ile** Helix: 4,914 Sheet: 5,323 Coil: 3,712 Total: 13,949

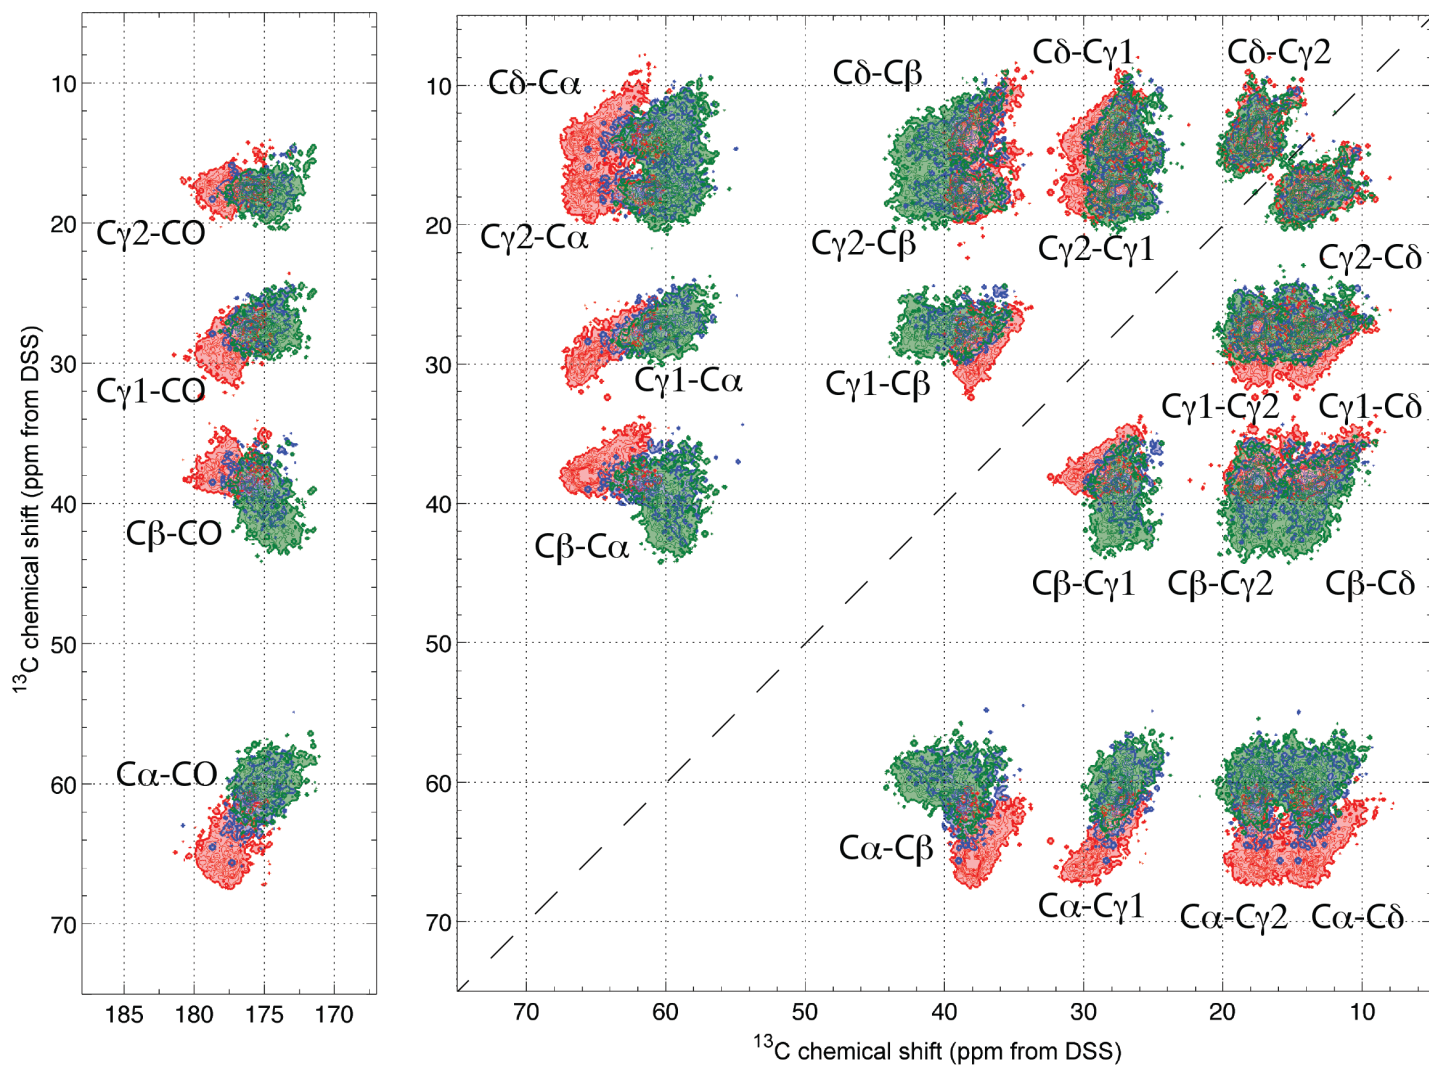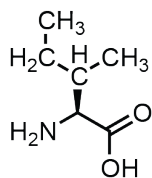

Supplemental Figure S9

**Lys** Helix: 6,992 Sheet: 3,607 Coil: 8,119 Total: 18,718

**K**

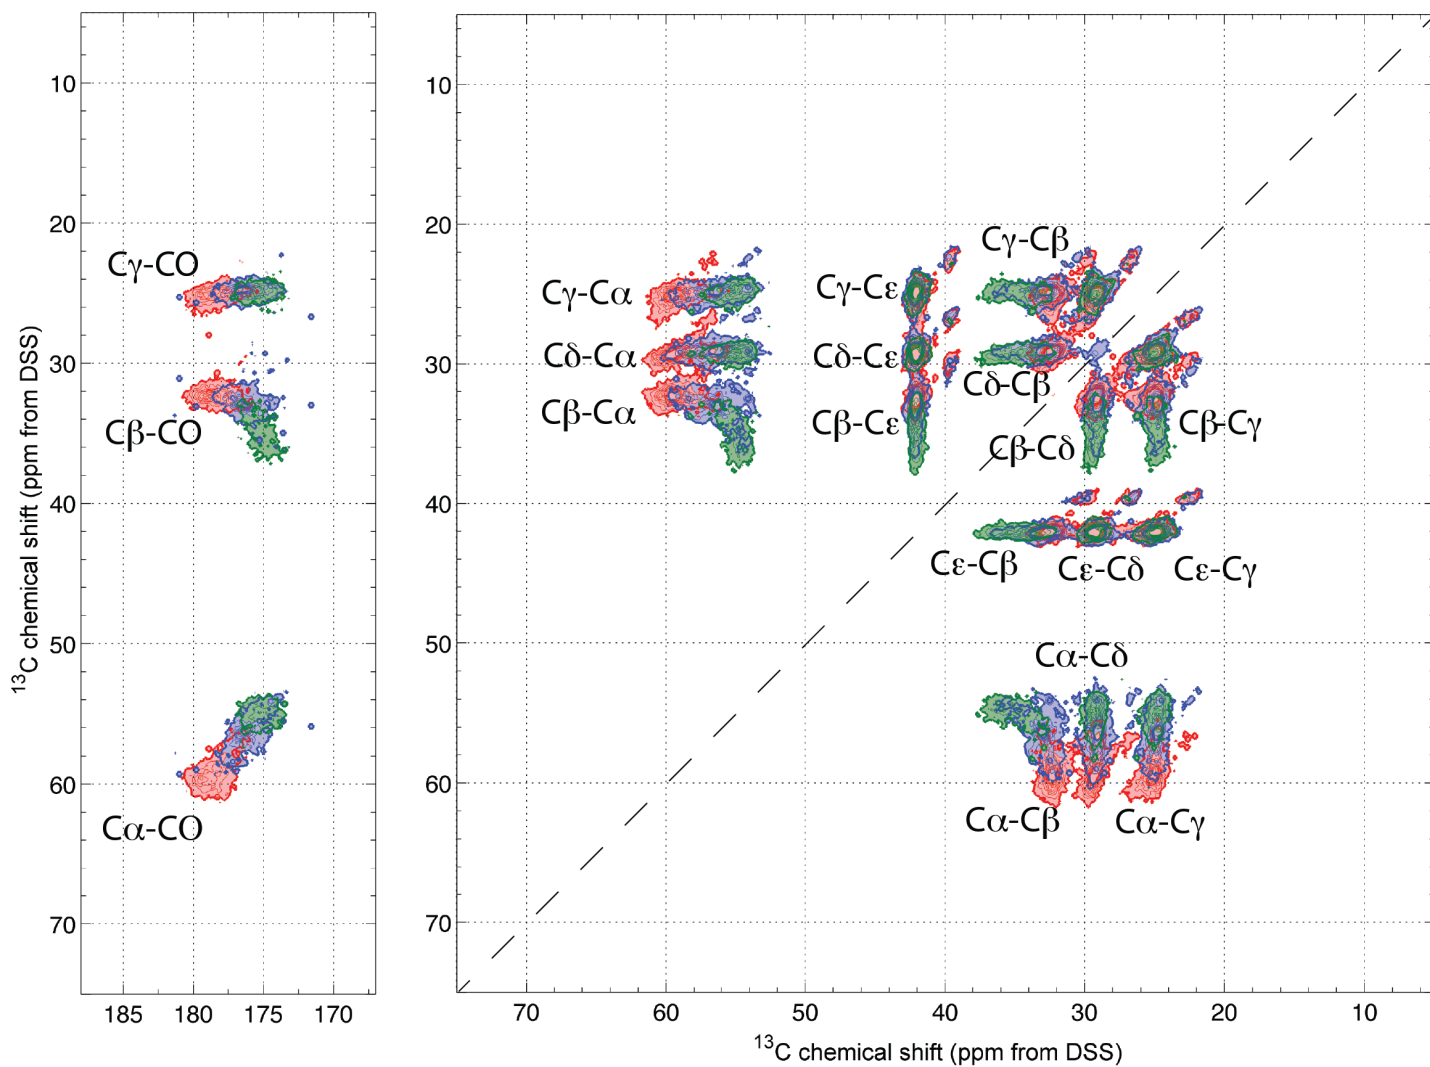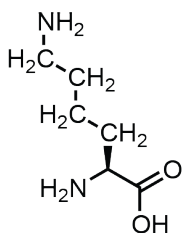

Supplemental Figure S10

**Leu** Helix: 9,832 Sheet: 5,765 Coil: 7,150 Total: 22,747

L

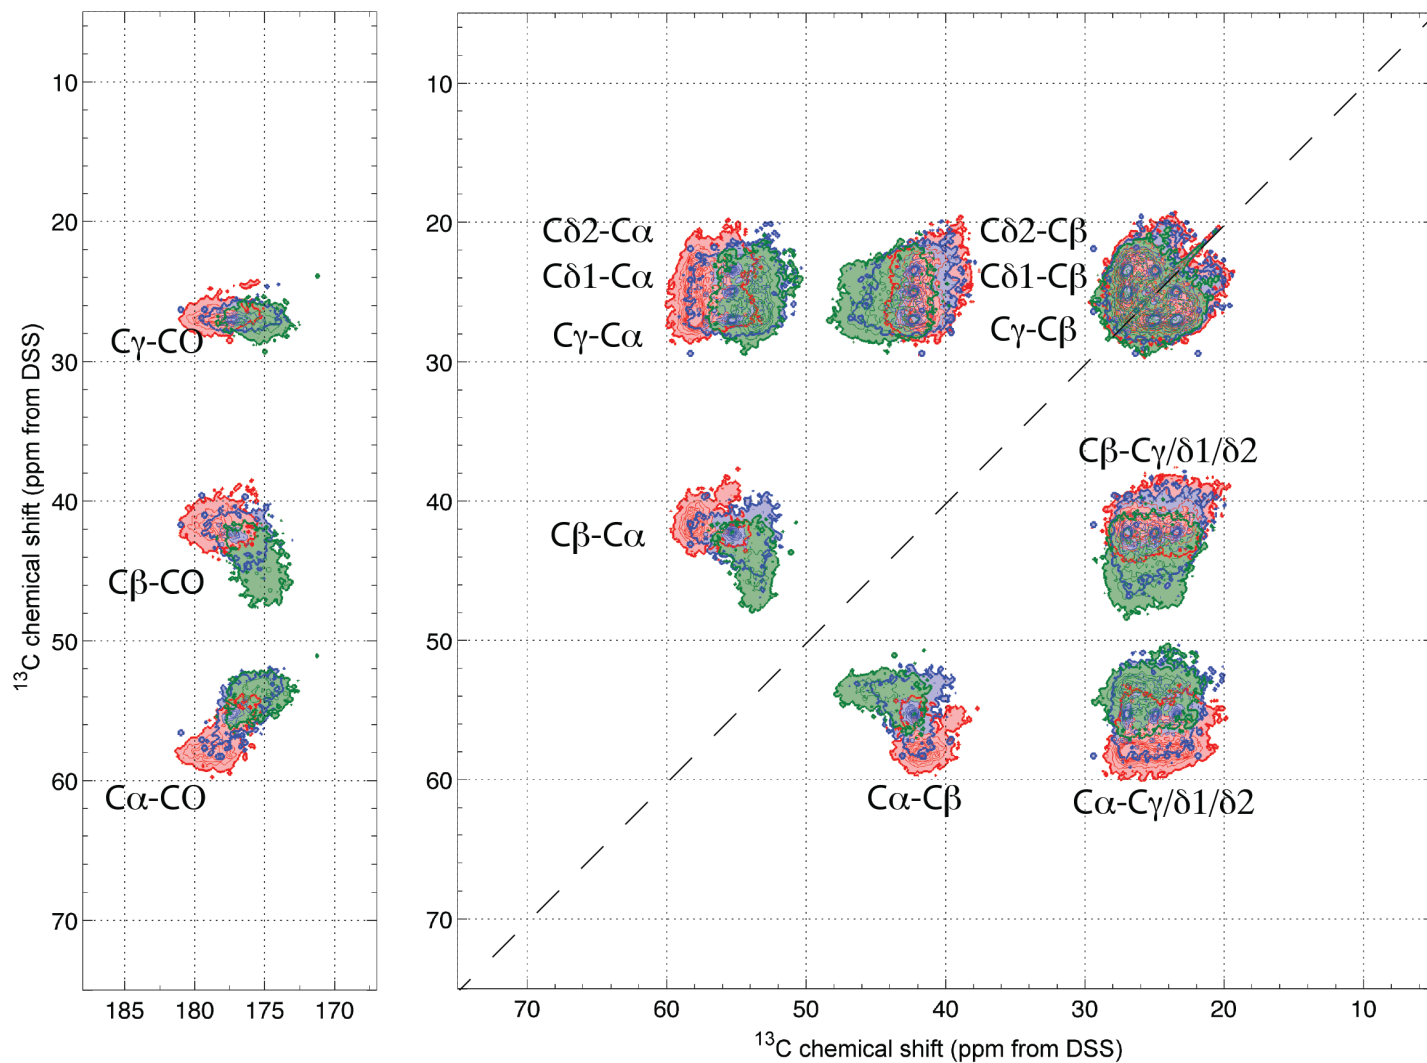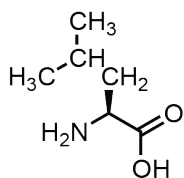

2% -- 50% Contour Levels

# Met

 Helix: 2,293 Sheet: 1,136 Coil: 2,307 Total: 5,736

# M

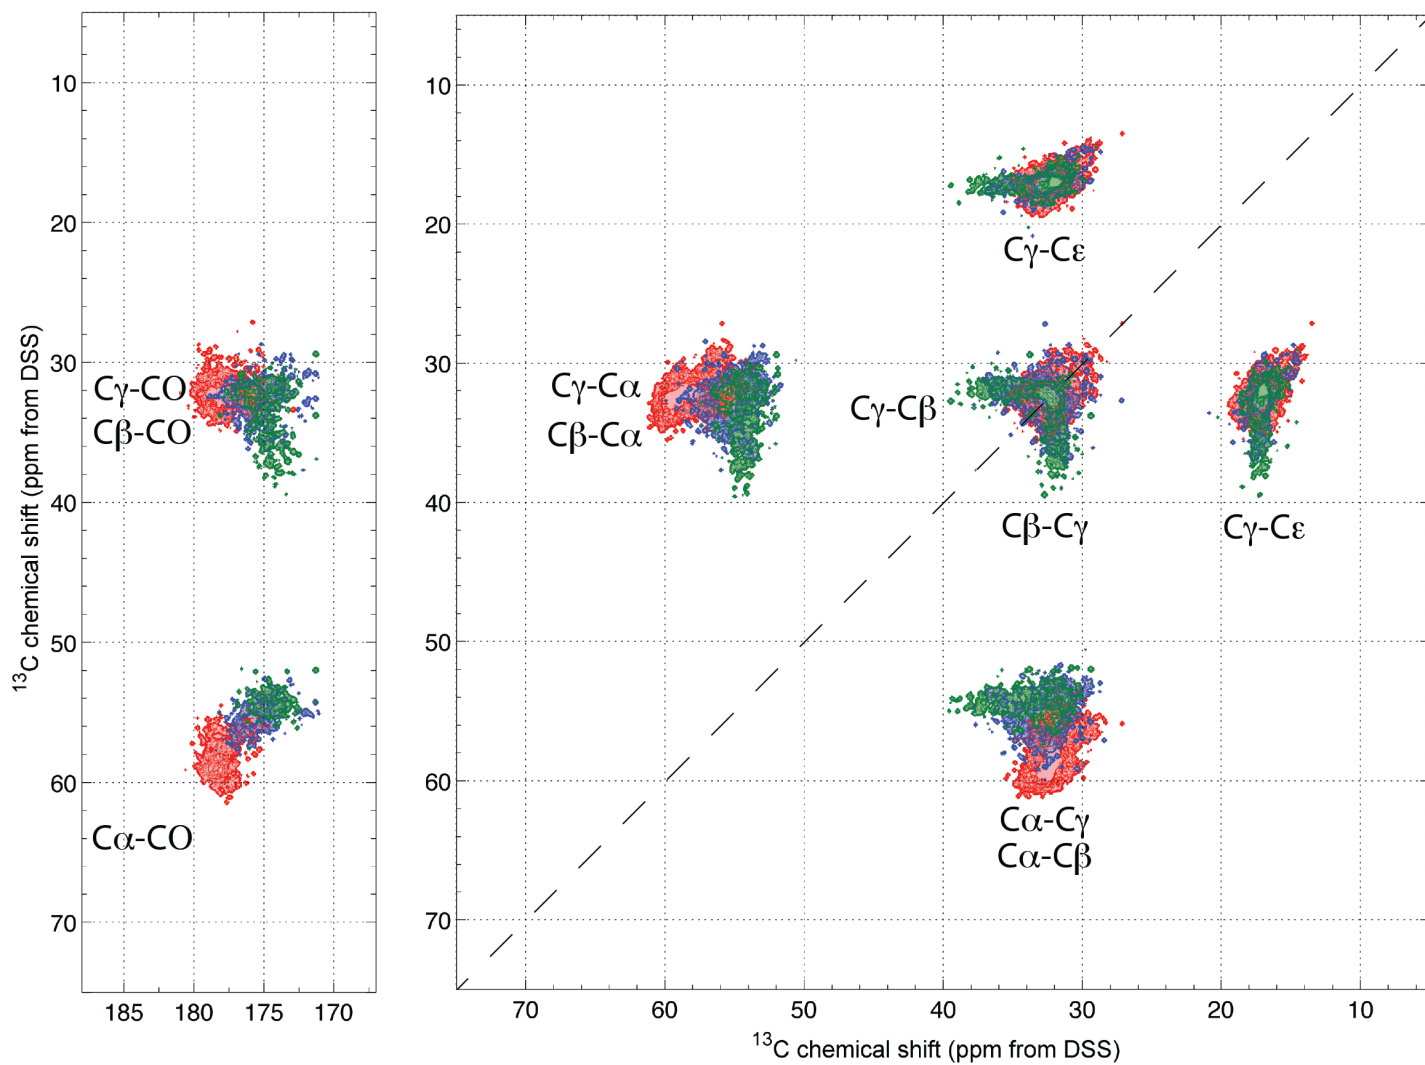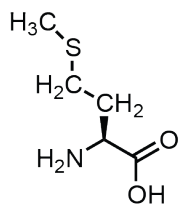

Supplemental Figure S12

**Asn** Helix: 2,913 Sheet: 1,353 Coil: 6,452 Total: 10,718

**N**

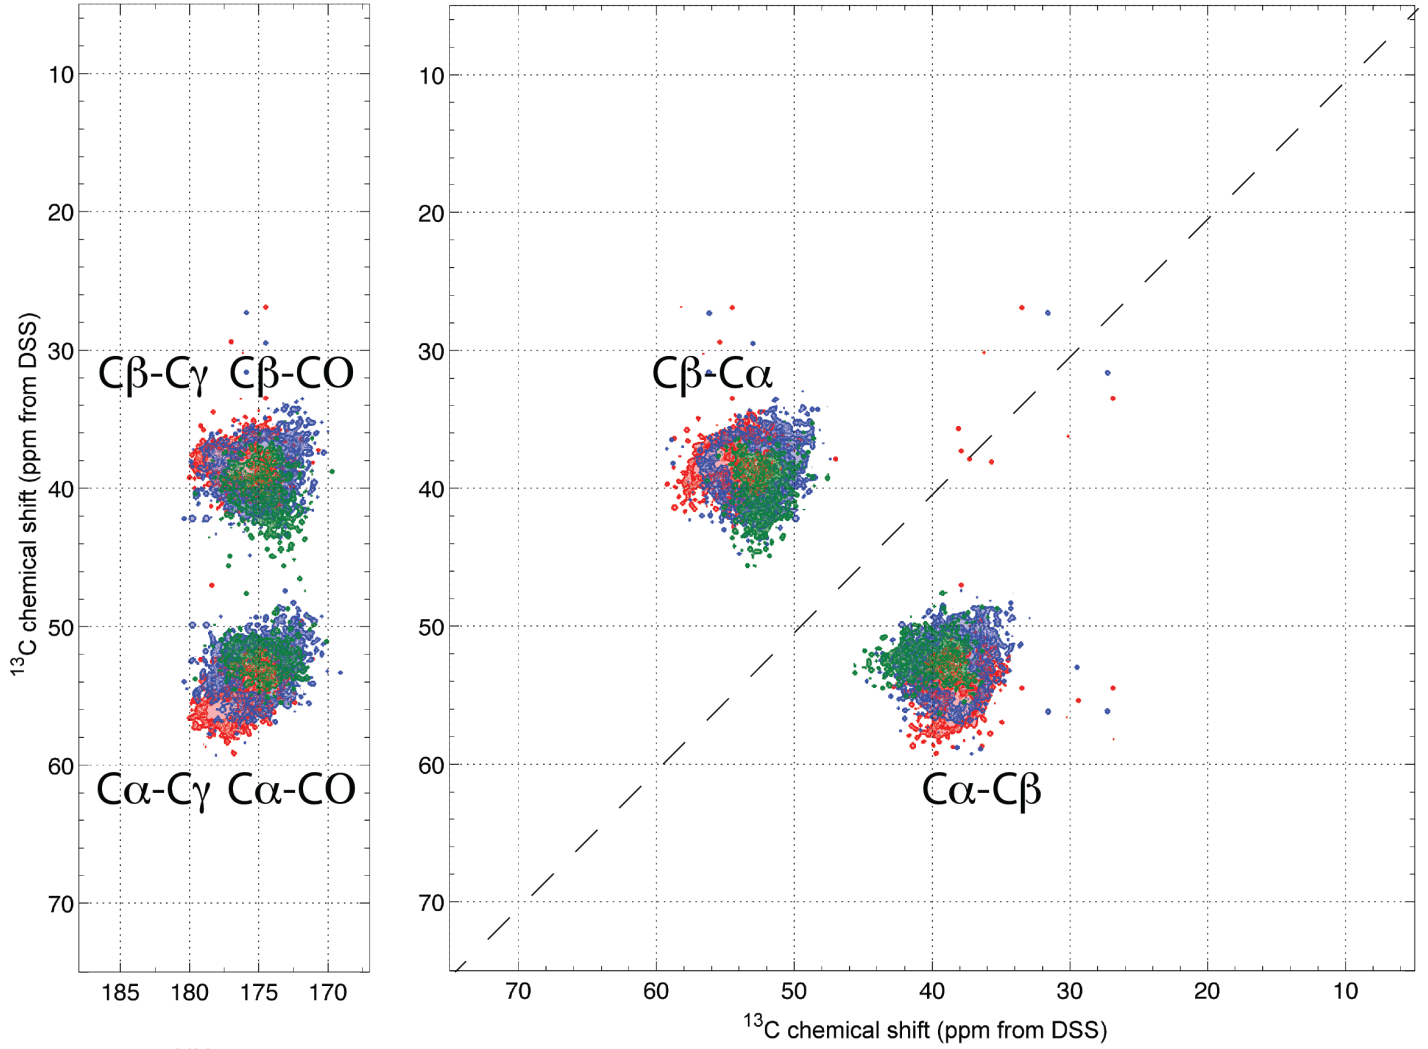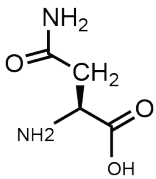

7.5% -- 50% Contour Levels

Supplemental Figure S13

**Pro** Helix: 1,366 Sheet: 1,011 Coil: 8,795 Total: 11,172

**P**

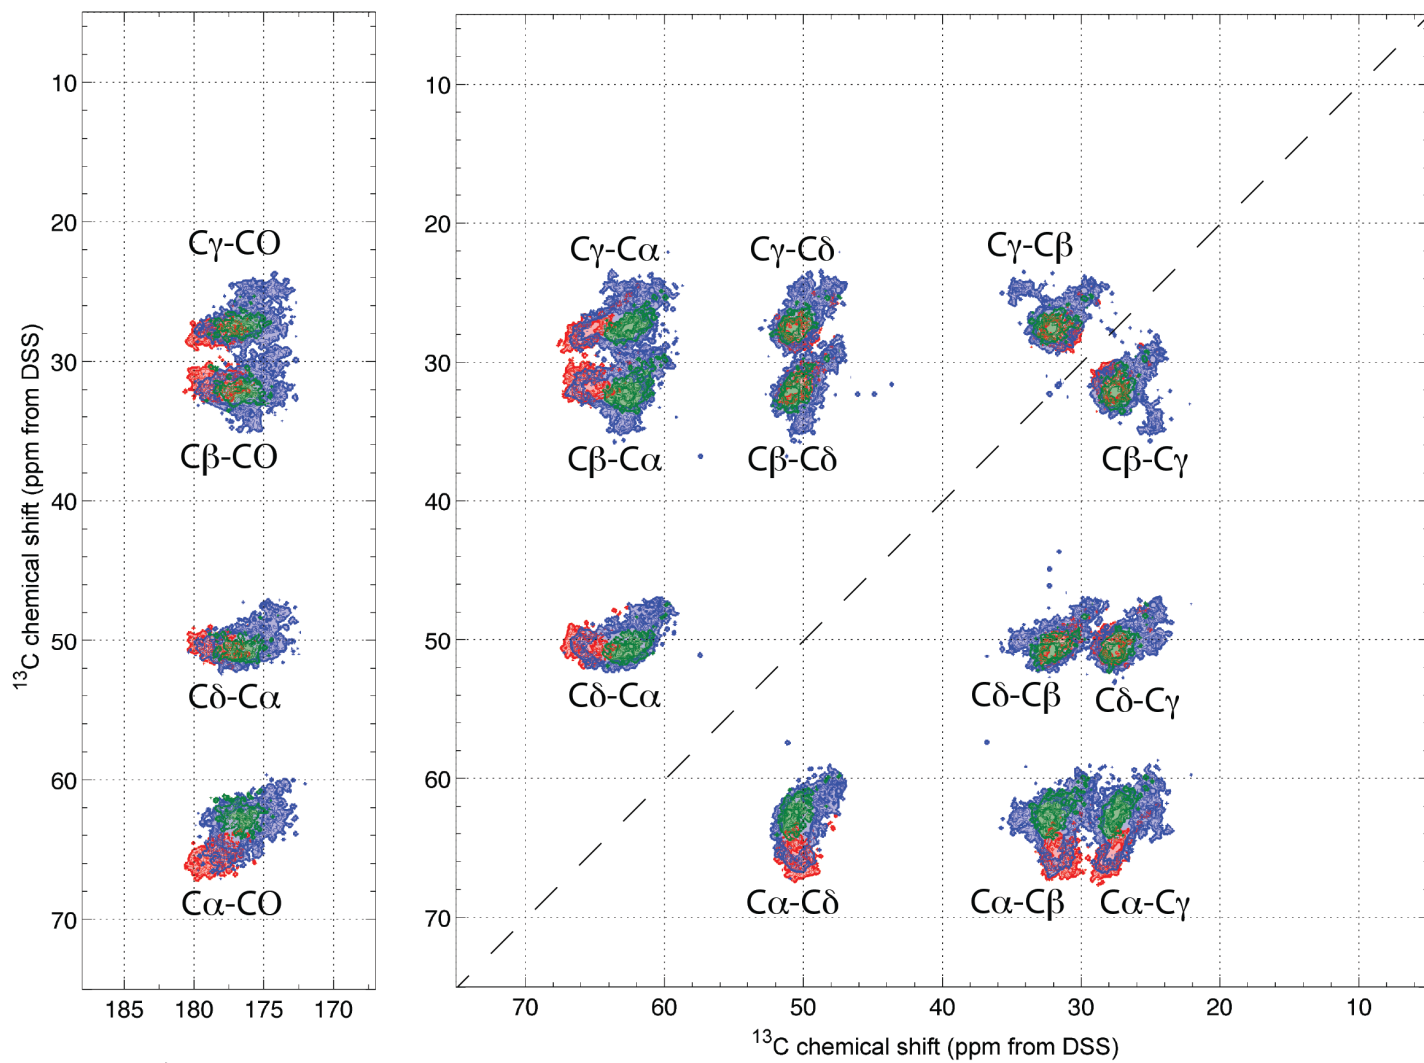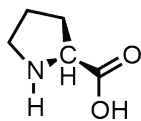

7.5% -- 50% Contour Levels

Supplemental Figure S14

**Gln** Helix: 4,765 Sheet: 1,984 Coil: 4,283 Total: 11,032

Q

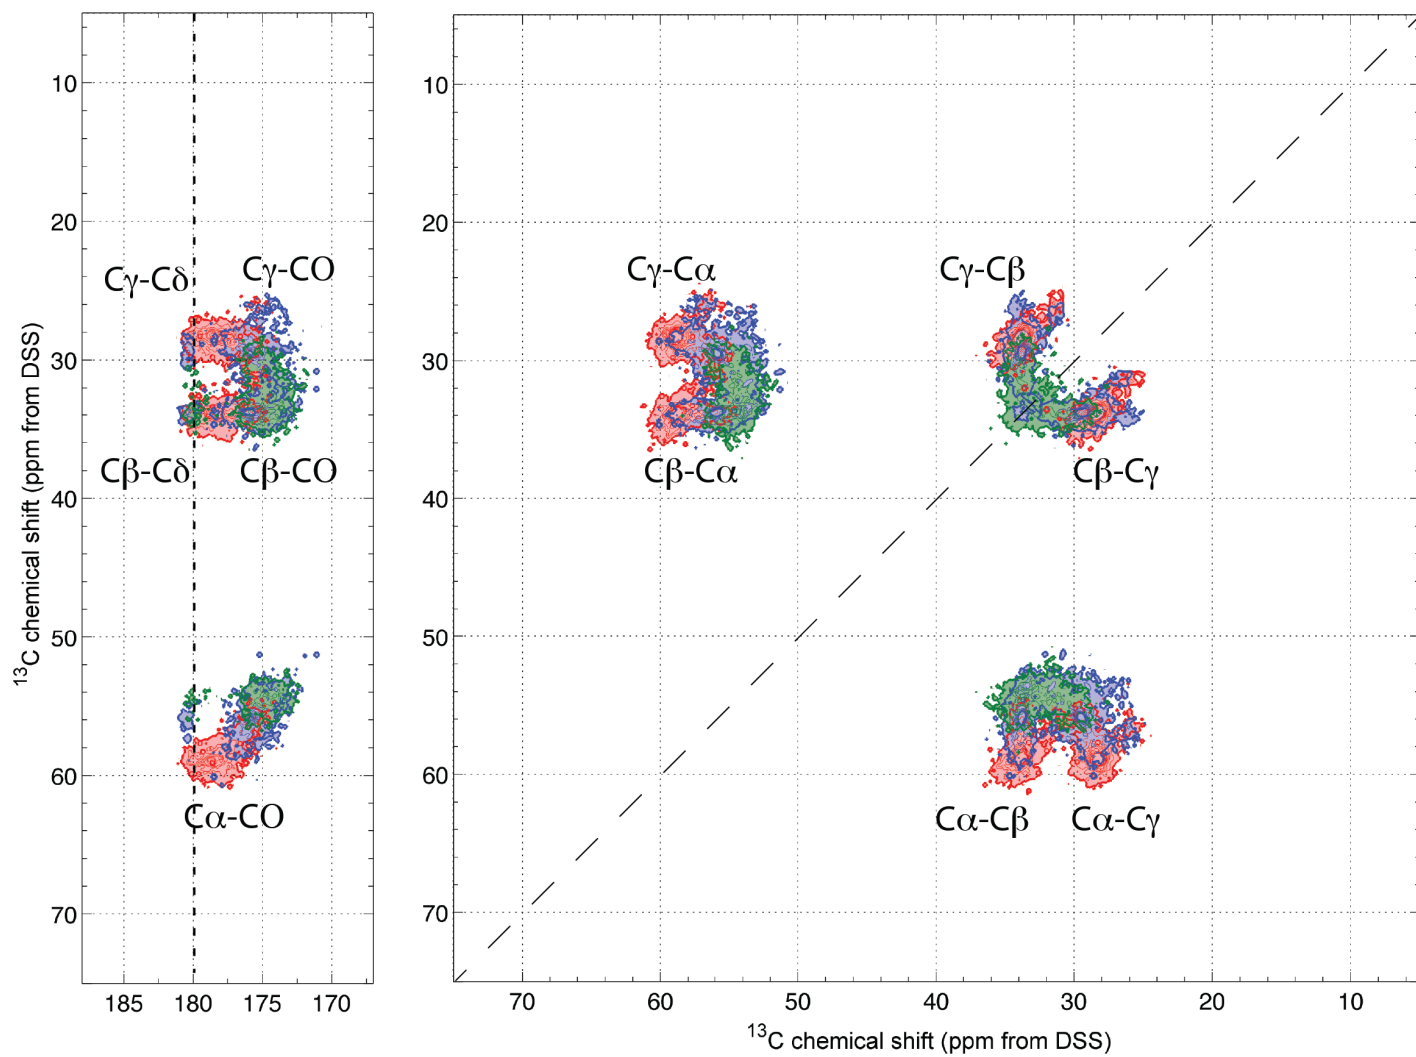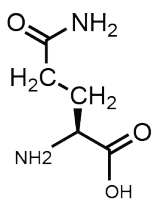

2% -- 50% Contour Levels

Supplemental Figure S15

**Arg** Helix: 4,987 Sheet: 2,900 Coil: 5,323 Total:13,210

**R**

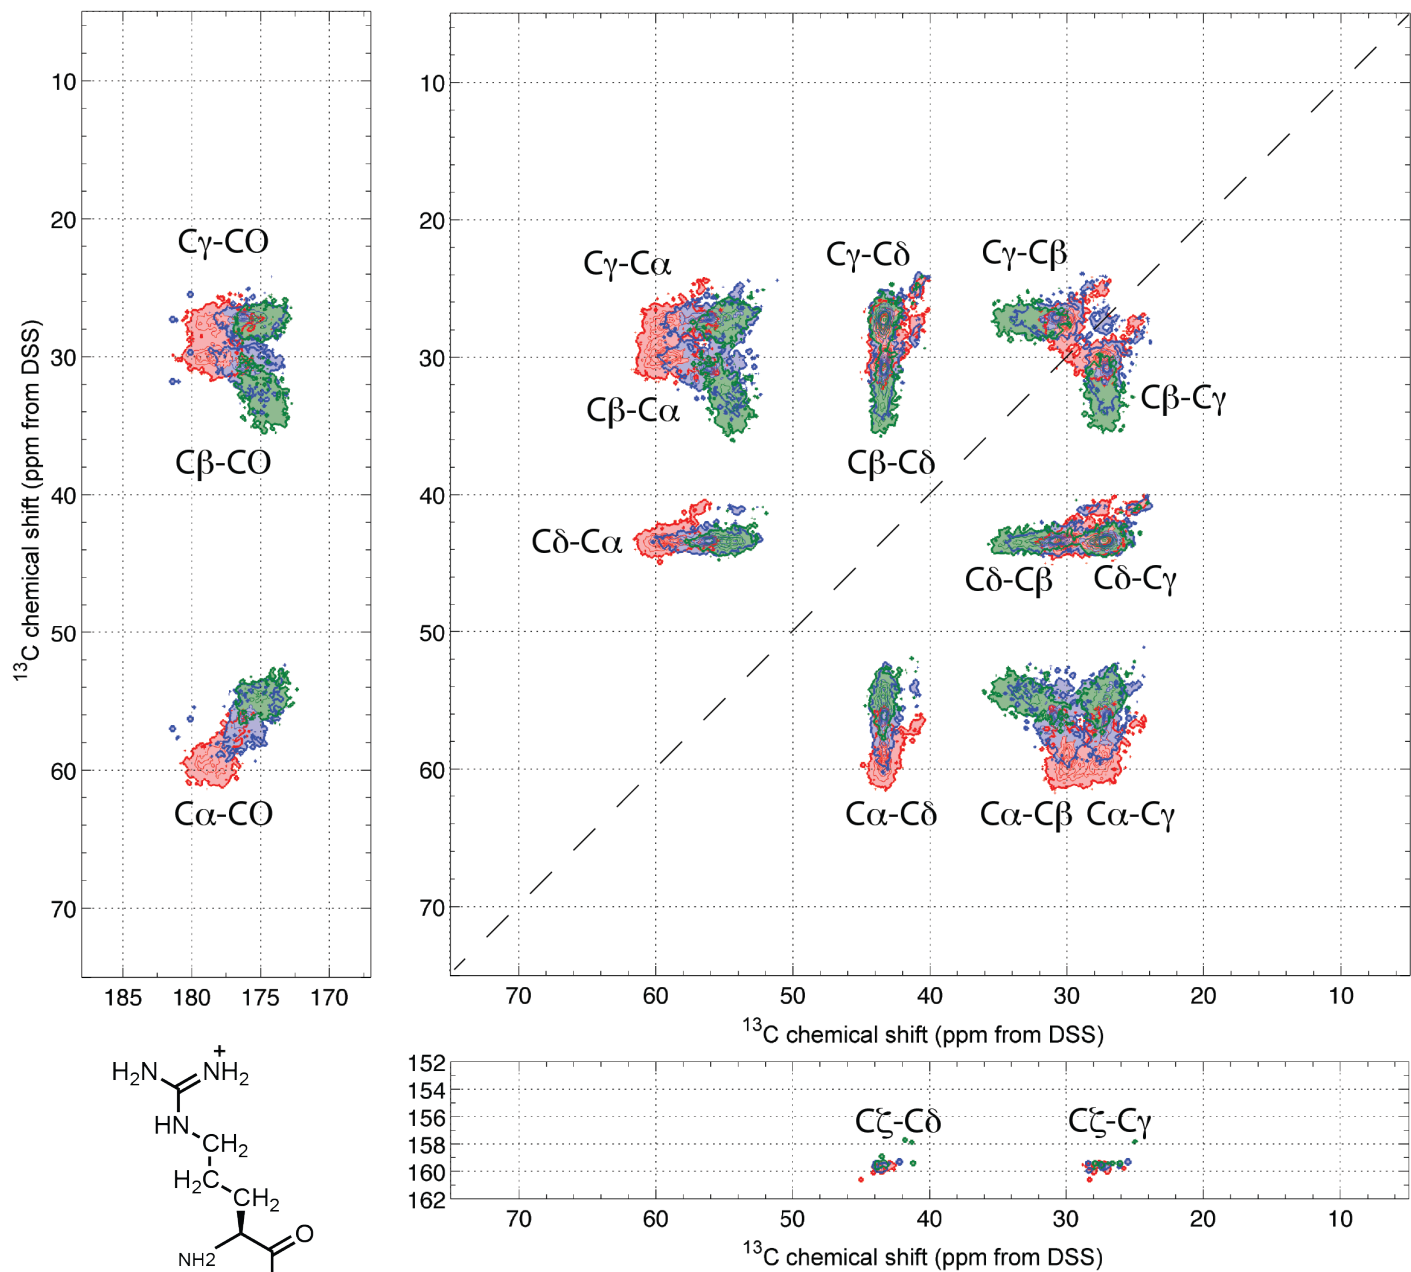

2% -- 50% Contour Levels



Supplemental Figure S16

**Ser** Helix: 4,246 Sheet: 3,000 Coil: 10,085 Total: 17,331

S

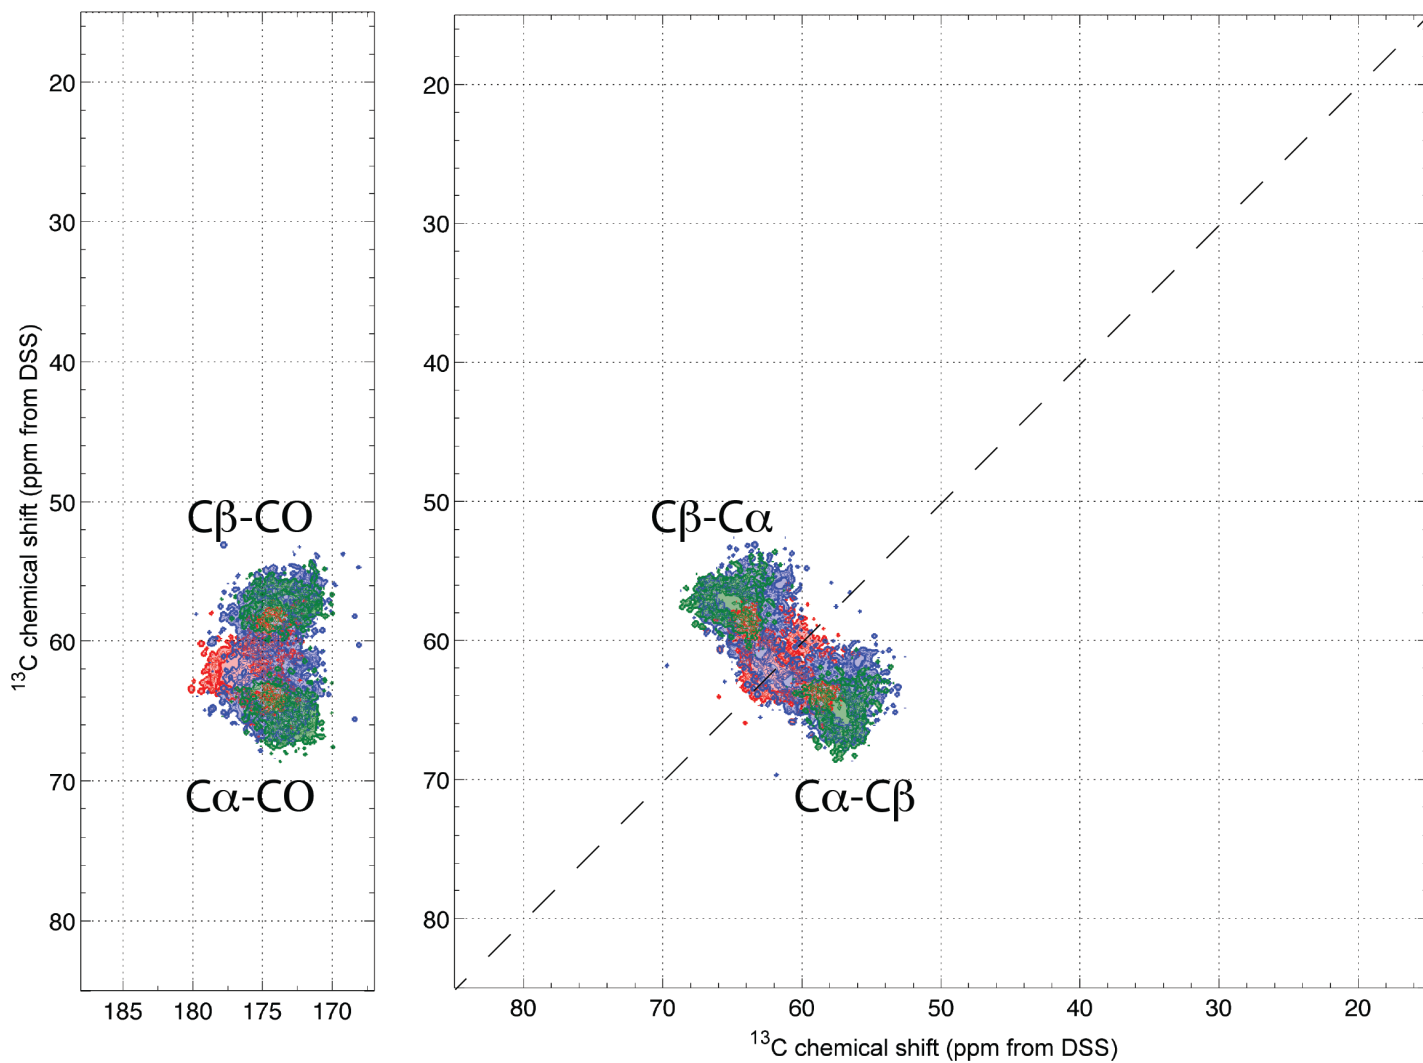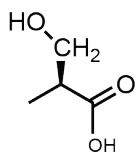

Supplemental Figure S17

**Thr** Helix: 3,367 Sheet: 4,084 Coil: 6,709 Total: 14,160

**T**

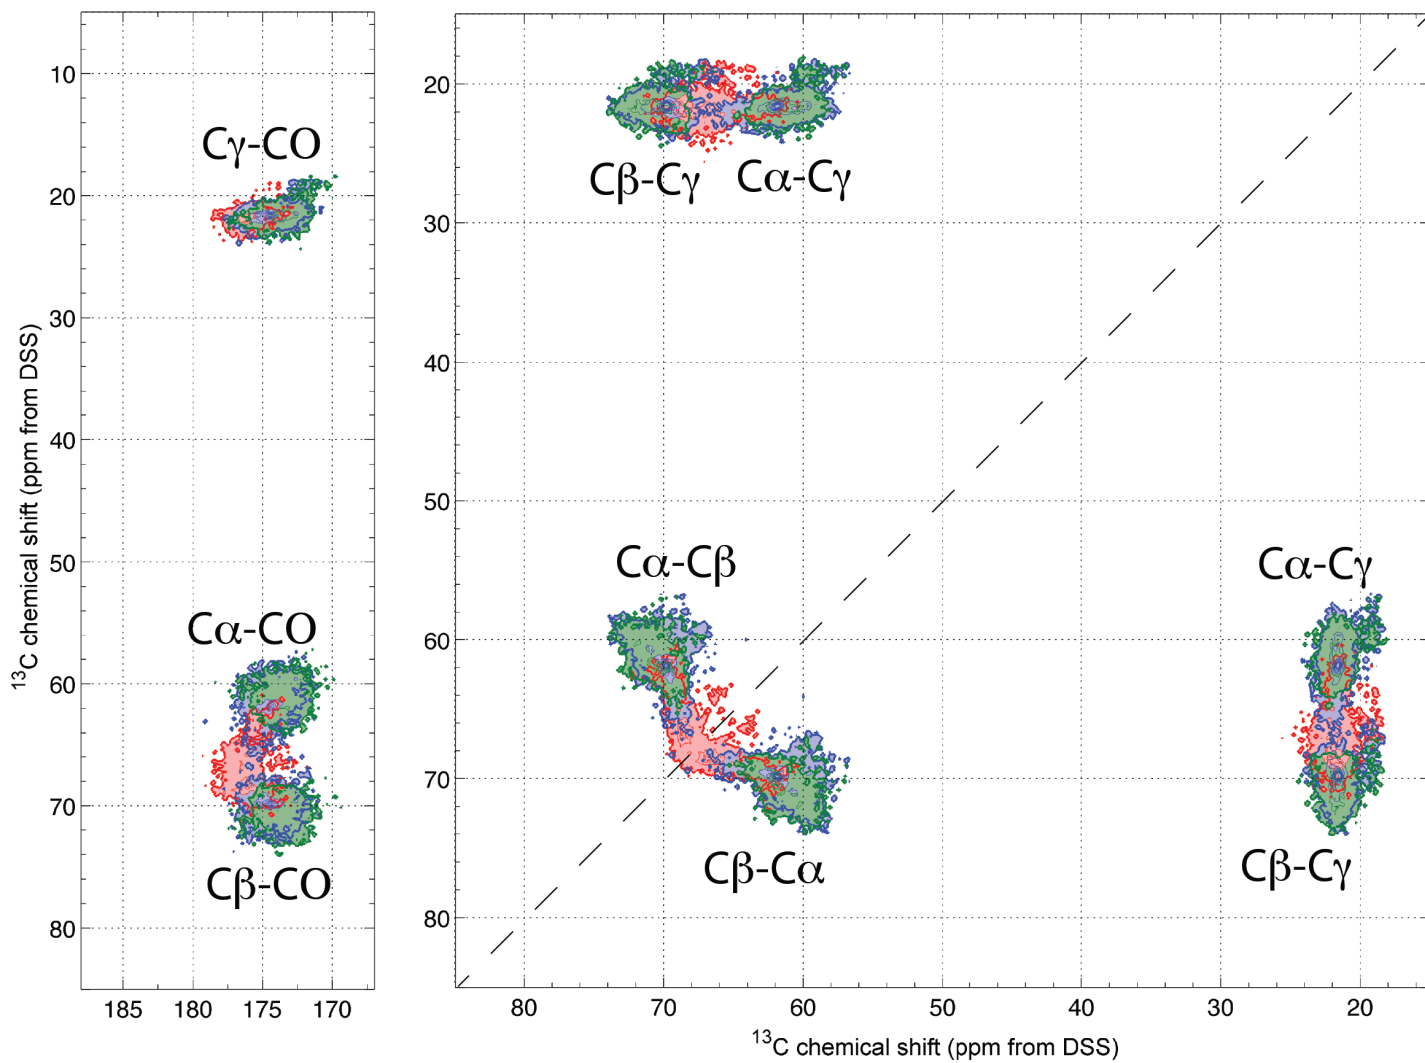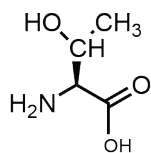

Supplemental Figure S18

**Val** Helix: 5,287 Sheet: 7,668 Coil: 5,367 Total: 18,322

**V**

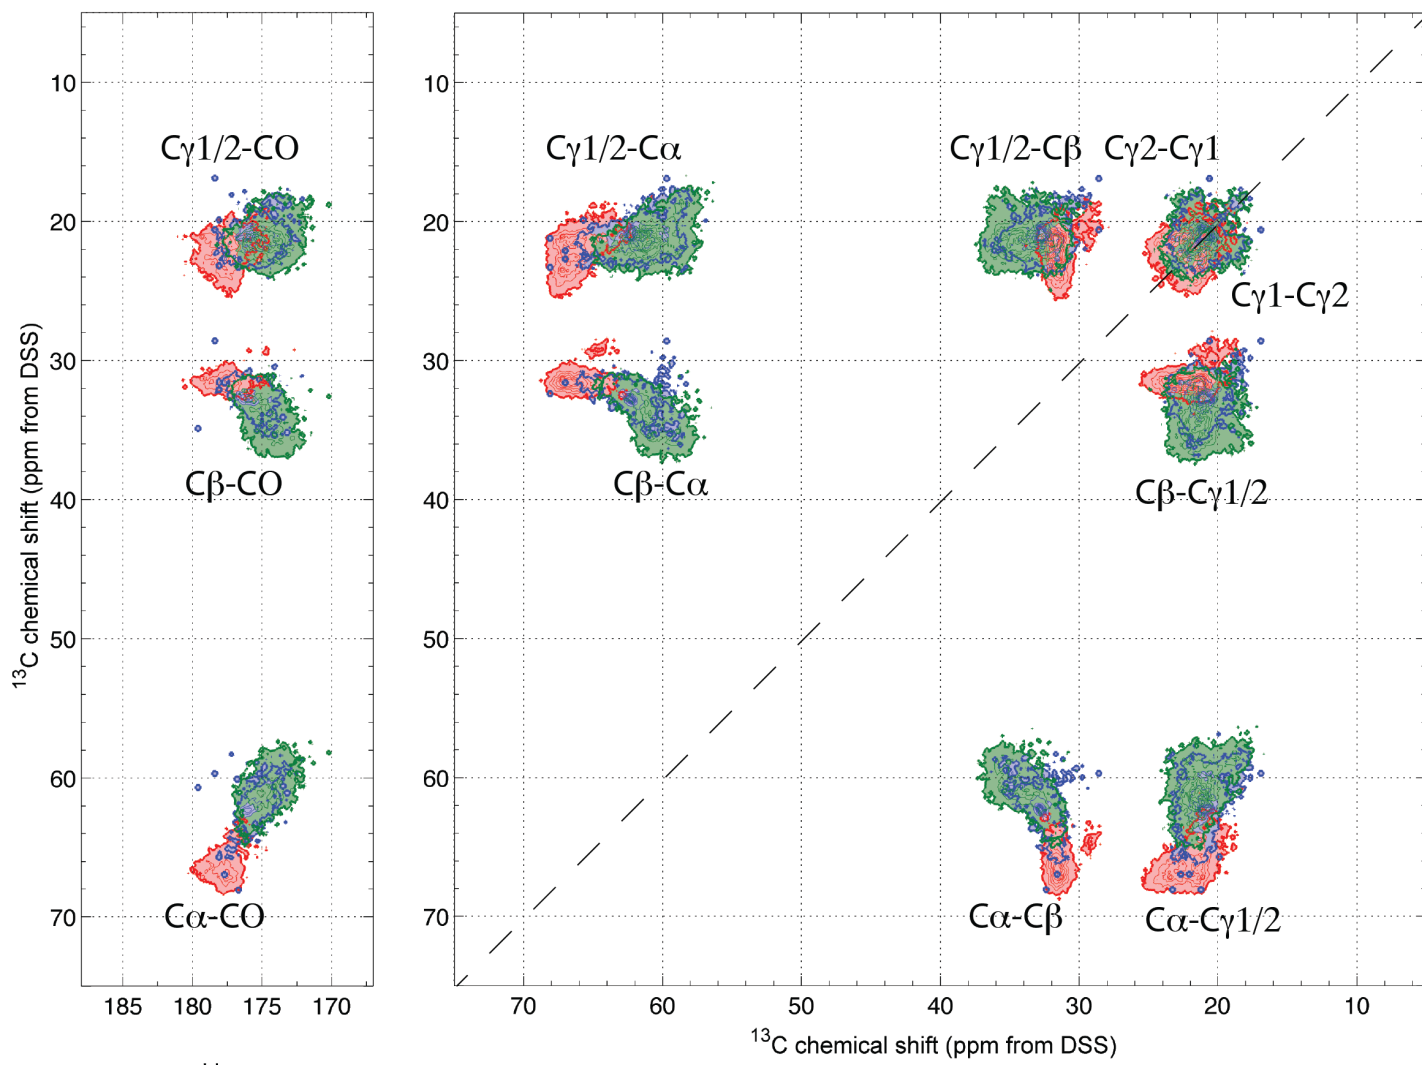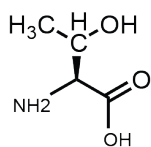

2% -- 50% Contour Levels

Supplemental Figure S19

# Trp

Helix: 1,077 Sheet: 1,112 Coil: 1,023 Total: 3,212

# W

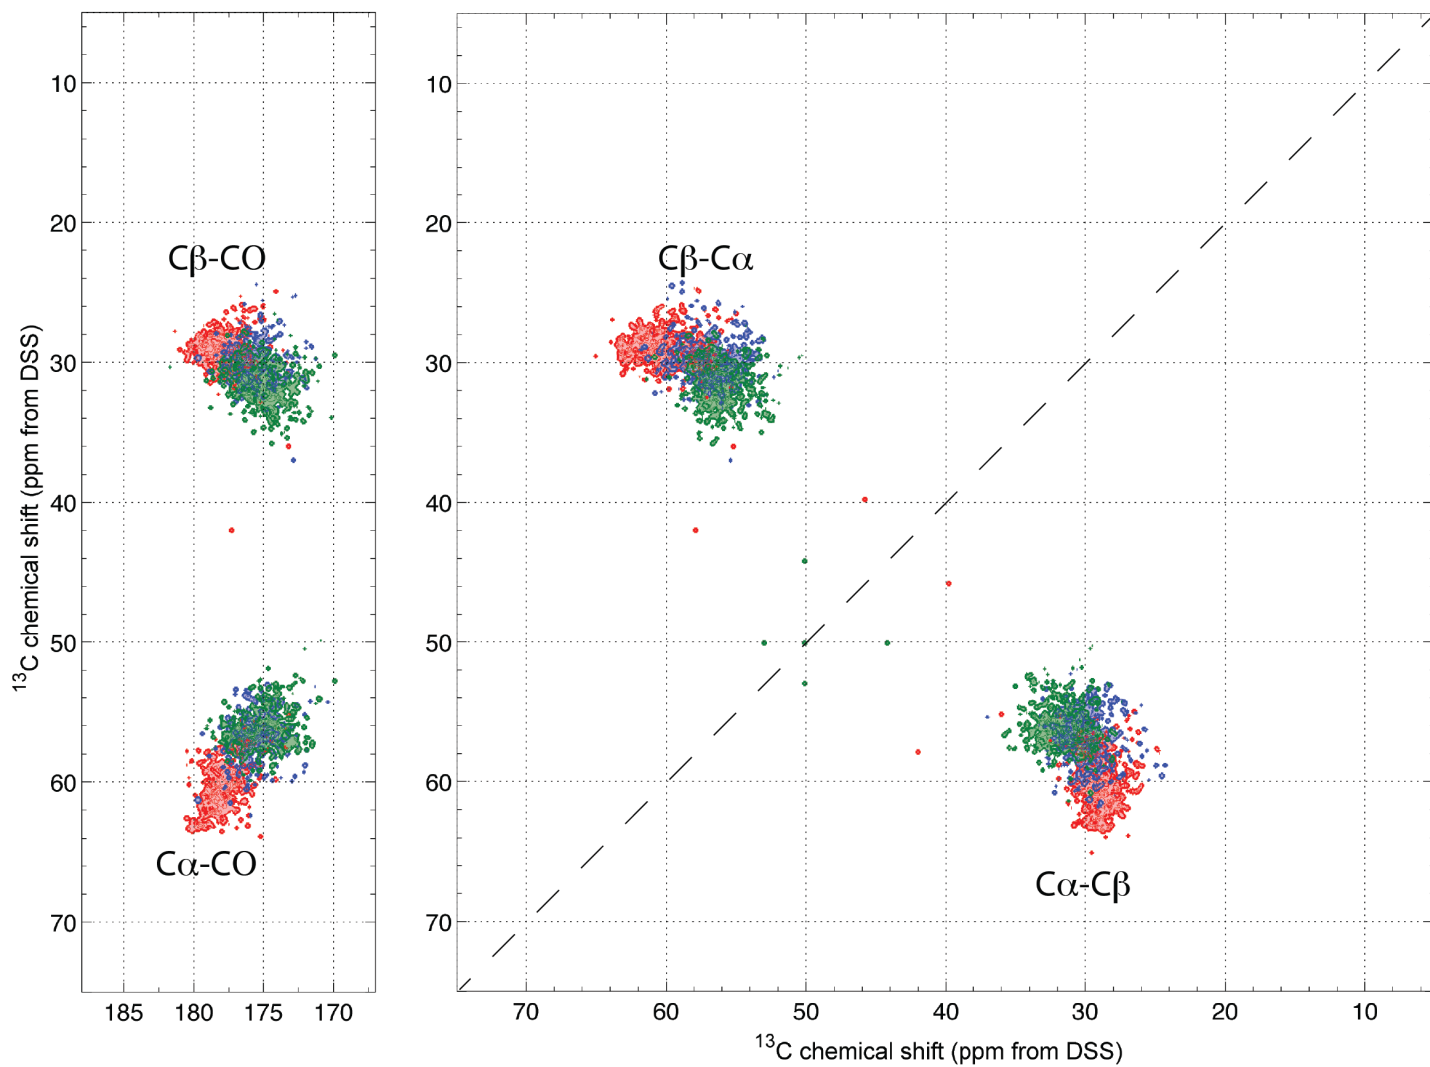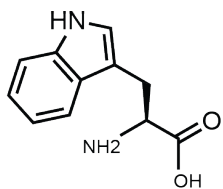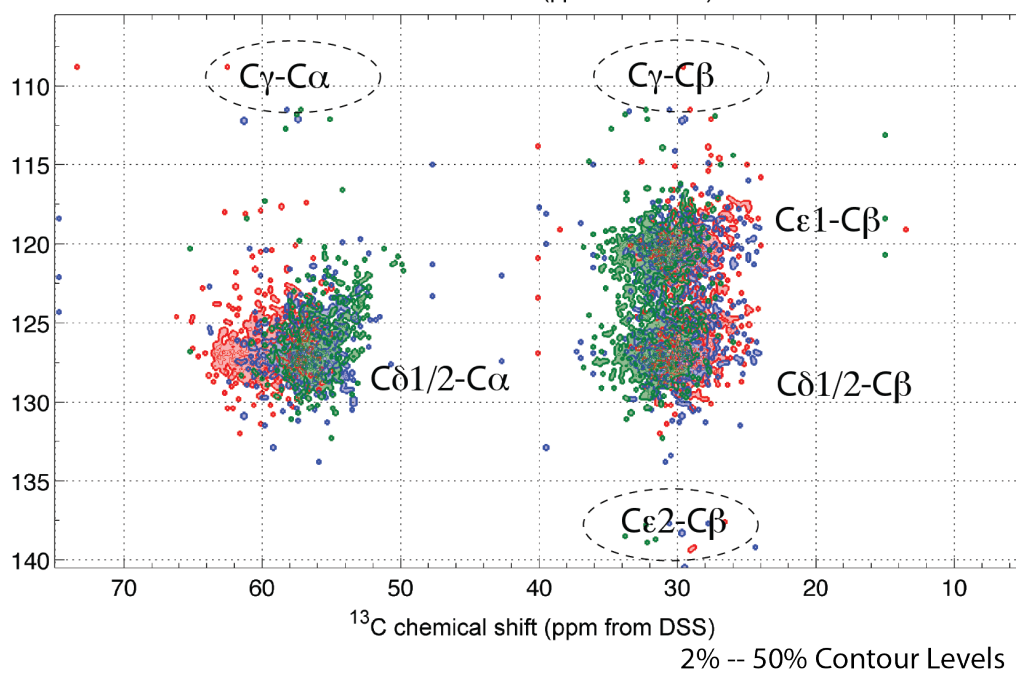

2% -- 50% Contour Levels

Supplemental Figure S20

**Tyr** Helix: 2,590 Sheet: 2,925 Coil: 2,786 Total: 8,301

**Y**

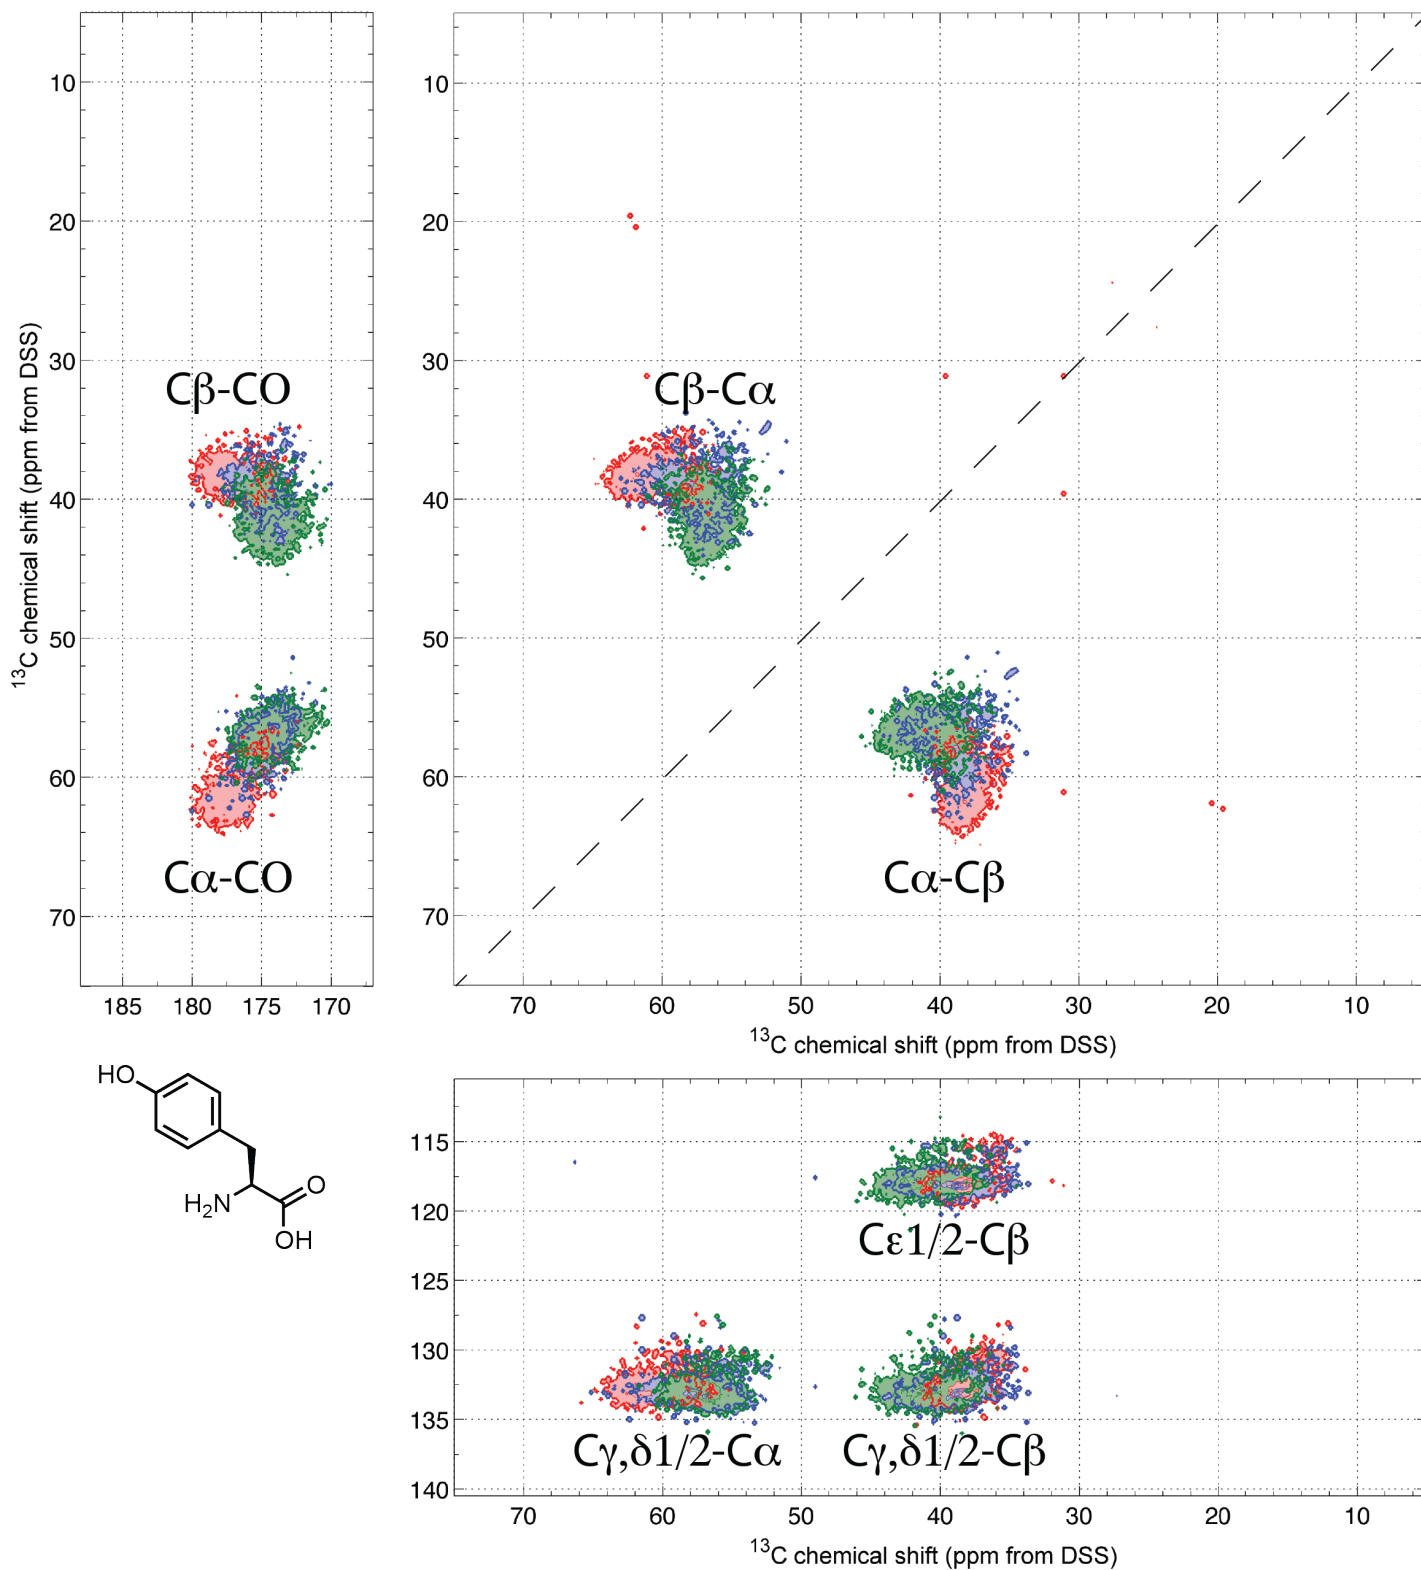

0.5% -- 50% Contour Levels

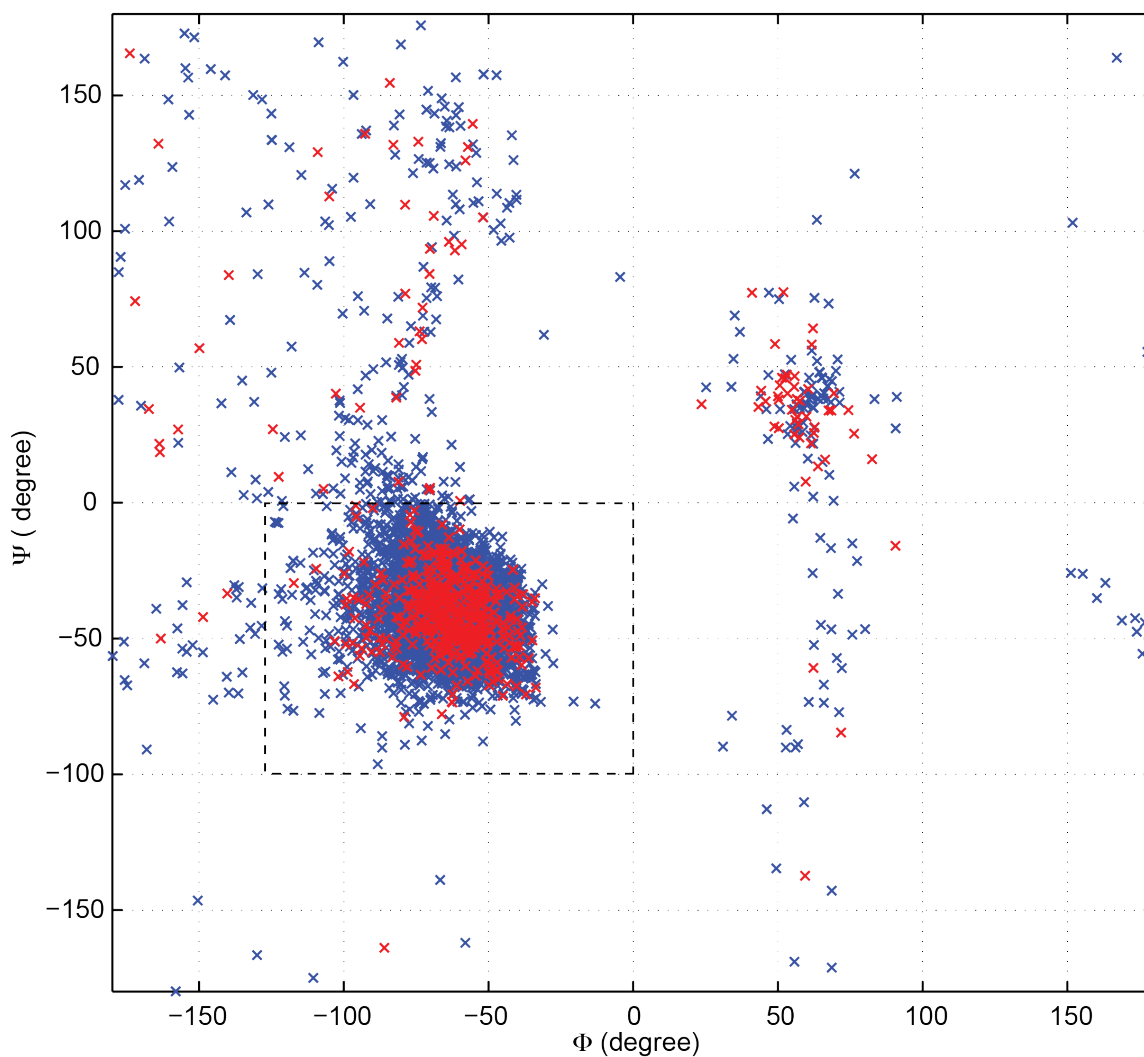

**Figure S21.** Ramachandran diagram of the Ala residues with different  $\alpha$ -helical chemical shift ranges as shown in Figure 1a. Torsion angles from the main ( $C\alpha$ ,  $C\beta$ ) chemical shift range of (54.0-57.0 ppm, 16.4-20.4 ppm) are plotted in blue. Torsion angles from the second ( $C\alpha$ ,  $C\beta$ ) chemical shifts of (51.6-54.0 ppm, 14.8-16.8 ppm) are shown in red. Dashed box indicates the range of ( $\phi$ ,  $\psi$ ) torsion angles that were included in the calculation of the average torsion angles and their standard deviations reported in the main text.

| AA | Strc  | C'     | C $\alpha$ | C $\beta$ | C $\gamma$ /C $\gamma$ 1 | C $\gamma$ 2 | C $\delta$ /C $\delta$ 1 | C $\delta$ 2 | C $\epsilon$ /C $\epsilon$ 1 | C $\epsilon$ 2 | C $\epsilon$ 3 | C $\zeta$ | C $\zeta$ 2 | C $\zeta$ 3 | C $\eta$ 2 |
|----|-------|--------|------------|-----------|--------------------------|--------------|--------------------------|--------------|------------------------------|----------------|----------------|-----------|-------------|-------------|------------|
| A  | Helix | 179.02 | 54.66      | 18.36     | -                        | -            | -                        | -            | -                            | -              | -              | -         | -           | -           | -          |
|    | Coil  | 177.02 | 52.46      | 19.32     | -                        | -            | -                        | -            | -                            | -              | -              | -         | -           | -           | -          |
|    | Sheet | 175.67 | 50.92      | 21.72     | -                        | -            | -                        | -            | -                            | -              | -              | -         | -           | -           | -          |
| C  | Helix | 176.16 | 61.40      | 30.93     | -                        | -            | -                        | -            | -                            | -              | -              | -         | -           | -           | -          |
|    | Coil  | 175.07 | 57.59      | 33.05     | -                        | -            | -                        | -            | -                            | -              | -              | -         | -           | -           | -          |
|    | Sheet | 173.75 | 56.45      | 34.18     | -                        | -            | -                        | -            | -                            | -              | -              | -         | -           | -           | -          |
| D  | Helix | 177.70 | 56.75      | 40.34     | 157.08                   | -            | -                        | -            | -                            | -              | -              | -         | -           | -           | -          |
|    | Coil  | 175.94 | 54.08      | 40.95     | 165.85                   | -            | -                        | -            | -                            | -              | -              | -         | -           | -           | -          |
|    | Sheet | 175.41 | 53.57      | 42.31     | 162.25                   | -            | -                        | -            | -                            | -              | -              | -         | -           | -           | -          |
| E  | Helix | 177.97 | 58.89      | 29.35     | 36.12                    | -            | 158.17                   | -            | -                            | -              | -              | -         | -           | -           | -          |
|    | Coil  | 176.07 | 56.66      | 30.18     | 36.06                    | -            | 174.49                   | -            | -                            | -              | -              | -         | -           | -           | -          |
|    | Sheet | 175.08 | 55.04      | 32.37     | 36.24                    | -            | 180.68                   | -            | -                            | -              | -              | -         | -           | -           | -          |
| F  | Helix | 176.52 | 60.51      | 38.86     | 139.63                   | -            | 130.98                   | 130.83       | 130.63                       | 130.62         | -              | 129.02    | -           | -           | -          |
|    | Coil  | 174.86 | 57.47      | 39.68     | 138.45                   | -            | 131.12                   | 131.17       | 130.64                       | 130.60         | -              | 129.07    | -           | -           | -          |
|    | Sheet | 174.18 | 56.40      | 41.78     | 139.63                   | -            | 131.54                   | 131.64       | 130.42                       | 130.51         | -              | 128.94    | -           | -           | -          |
| G  | Helix | 175.30 | 46.72      | -         | -                        | -            | -                        | -            | -                            | -              | -              | -         | -           | -           | -          |
|    | Coil  | 173.81 | 45.33      | -         | -                        | -            | -                        | -            | -                            | -              | -              | -         | -           | -           | -          |
|    | Sheet | 172.08 | 45.17      | -         | -                        | -            | -                        | -            | -                            | -              | -              | -         | -           | -           | -          |
| H  | Helix | 176.62 | 58.57      | 29.85     | 128.00                   | -            | -                        | 120.48       | 137.99                       | -              | -              | -         | -           | -           | -          |
|    | Coil  | 174.73 | 55.95      | 30.17     | 133.23                   | -            | -                        | 119.23       | 137.22                       | -              | -              | -         | -           | -           | -          |
|    | Sheet | 173.96 | 55.17      | 32.26     | 132.86                   | -            | -                        | 119.48       | 137.09                       | -              | -              | -         | -           | -           | -          |
| I  | Helix | 176.84 | 64.26      | 37.51     | 28.67                    | 17.42        | 13.46                    | -            | -                            | -              | -              | -         | -           | -           | -          |
|    | Coil  | 175.47 | 60.71      | 38.67     | 27.17                    | 17.60        | 13.36                    | -            | -                            | -              | -              | -         | -           | -           | -          |
|    | Sheet | 174.77 | 59.83      | 39.95     | 27.38                    | 17.72        | 13.71                    | -            | -                            | -              | -              | -         | -           | -           | -          |
| K  | Helix | 177.46 | 58.82      | 32.20     | 25.09                    | -            | 29.01                    | -            | 41.79                        | -              | -              | -         | -           | -           | -          |
|    | Coil  | 175.82 | 56.23      | 32.82     | 24.82                    | -            | 28.93                    | -            | 41.96                        | -              | -              | -         | -           | -           | -          |
|    | Sheet | 175.09 | 55.05      | 34.82     | 24.93                    | -            | 29.20                    | -            | 41.94                        | -              | -              | -         | -           | -           | -          |
| L  | Helix | 178.12 | 57.34      | 41.46     | 26.84                    | -            | 24.74                    | 24.06        | -                            | -              | -              | -         | -           | -           | -          |
|    | Coil  | 176.42 | 54.78      | 42.31     | 26.79                    | -            | 24.83                    | 23.97        | -                            | -              | -              | -         | -           | -           | -          |
|    | Sheet | 175.43 | 53.83      | 44.24     | 27.10                    | -            | 25.07                    | 24.70        | -                            | -              | -              | -         | -           | -           | -          |
| M  | Helix | 177.73 | 57.99      | 32.20     | 32.15                    | -            | -                        | -            | 17.11                        | -              | -              | -         | -           | -           | -          |
|    | Coil  | 175.43 | 55.26      | 33.16     | 31.96                    | -            | -                        | -            | 17.14                        | -              | -              | -         | -           | -           | -          |
|    | Sheet | 174.52 | 54.27      | 35.28     | 32.02                    | -            | -                        | -            | 17.28                        | -              | -              | -         | -           | -           | -          |
| N  | Helix | 176.35 | 55.27      | 38.23     | 169.18                   | -            | -                        | -            | -                            | -              | -              | -         | -           | -           | -          |
|    | Coil  | 174.68 | 53.12      | 38.66     | 171.79                   | -            | -                        | -            | -                            | -              | -              | -         | -           | -           | -          |
|    | Sheet | 174.37 | 52.26      | 40.28     | 171.76                   | -            | -                        | -            | -                            | -              | -              | -         | -           | -           | -          |
| P  | Helix | 177.52 | 65.27      | 31.54     | 27.74                    | -            | 50.17                    | -            | -                            | -              | -              | -         | -           | -           | -          |
|    | Coil  | 176.21 | 63.06      | 32.04     | 27.21                    | -            | 50.26                    | -            | -                            | -              | -              | -         | -           | -           | -          |
|    | Sheet | 175.97 | 62.71      | 32.15     | 27.34                    | -            | 50.47                    | -            | -                            | -              | -              | -         | -           | -           | -          |
| Q  | Helix | 177.56 | 58.30      | 28.57     | 33.84                    | -            | 177.25                   | -            | -                            | -              | -              | -         | -           | -           | -          |
|    | Coil  | 175.48 | 55.73      | 29.46     | 33.71                    | -            | 175.48                   | -            | -                            | -              | -              | -         | -           | -           | -          |
|    | Sheet | 174.66 | 54.49      | 31.47     | 33.81                    | -            | 178.00                   | -            | -                            | -              | -              | -         | -           | -           | -          |
| R  | Helix | 177.83 | 58.79      | 29.99     | 27.42                    | -            | 43.14                    | -            | -                            | -              | -              | 160.80    | -           | -           | -          |
|    | Coil  | 175.78 | 55.96      | 30.75     | 27.07                    | -            | 43.17                    | -            | -                            | -              | -              | 159.95    | -           | -           | -          |

|          |              |        |       |       |        |       |        |        |        |        |        |        |        |        |        |
|----------|--------------|--------|-------|-------|--------|-------|--------|--------|--------|--------|--------|--------|--------|--------|--------|
|          | <b>Sheet</b> | 174.82 | 54.77 | 32.80 | 27.29  | -     | 43.32  | -      | -      | -      | -      | 159.99 | -      | -      | -      |
| <b>Q</b> | <b>Helix</b> | 175.83 | 60.94 | 62.56 | -      | -     | -      | -      | -      | -      | -      | -      | -      | -      | -      |
|          | <b>Coil</b>  | 174.35 | 58.22 | 63.67 | -      | -     | -      | -      | -      | -      | -      | -      | -      | -      | -      |
|          | <b>Sheet</b> | 173.43 | 57.17 | 64.96 | -      | -     | -      | -      | -      | -      | -      | -      | -      | -      | -      |
| <b>T</b> | <b>Helix</b> | 175.95 | 65.42 | 68.20 | -      | 21.67 | -      | -      | -      | -      | -      | -      | -      | -      | -      |
|          | <b>Coil</b>  | 174.48 | 61.46 | 69.44 | -      | 21.61 | -      | -      | -      | -      | -      | -      | -      | -      | -      |
|          | <b>Sheet</b> | 173.58 | 61.08 | 70.39 | -      | 21.55 | -      | -      | -      | -      | -      | -      | -      | -      | -      |
| <b>V</b> | <b>Helix</b> | 177.34 | 65.82 | 31.54 | 21.94  | 22.11 | -      | -      | -      | -      | -      | -      | -      | -      | -      |
|          | <b>Coil</b>  | 175.49 | 61.78 | 32.76 | 21.21  | 20.89 | -      | -      | -      | -      | -      | -      | -      | -      | -      |
|          | <b>Sheet</b> | 174.60 | 60.68 | 34.00 | 21.46  | 21.13 | -      | -      | -      | -      | -      | -      | -      | -      | -      |
| <b>W</b> | <b>Helix</b> | 177.64 | 60.02 | 29.07 | 111.47 | -     | 126.23 | 128.50 | -      | 147.78 | 120.14 | -      | 114.01 | 121.19 | 123.75 |
|          | <b>Coil</b>  | 175.76 | 57.09 | 30.02 | 112.14 | -     | 126.31 | 130.64 | -      | 138.49 | 120.17 | -      | 114.12 | 121.24 | 123.43 |
|          | <b>Sheet</b> | 175.06 | 56.11 | 31.54 | 112.66 | -     | 126.03 | 122.84 | -      | 132.99 | 120.02 | -      | 114.07 | 121.05 | 123.57 |
| <b>Y</b> | <b>Helix</b> | 177.00 | 60.61 | 38.08 | 130.13 | -     | 132.04 | 131.81 | 117.76 | 117.74 | -      | 157.84 | -      | -      | -      |
|          | <b>Coil</b>  | 175.08 | 57.56 | 38.98 | 127.65 | -     | 132.63 | 132.33 | 117.88 | 117.73 | -      | 158.10 | -      | -      | -      |
|          | <b>Sheet</b> | 174.31 | 56.63 | 41.07 | 129.54 | -     | 132.65 | 132.68 | 117.78 | 117.75 | -      | 155.87 | -      | -      | -      |

**Supplementary Table S1.** Average  $^{13}\text{C}$  chemical shifts of different amino acids and secondary structures obtained from PACSYlite. The shifts are referenced to DSS.
